# 1 Amplification is the Primary Mode of Gene-by-Sex Interaction 2 in Complex Human Traits

3 Carrie Zhu<sup>1,2</sup>, Matthew J. Ming<sup>1,2</sup>, Jared M. Cole<sup>1,2</sup>, Michael D. Edge<sup>3</sup>, Mark Kirkpatrick<sup>2</sup>, Arbel Harpak<sup>1,2,+</sup>

4 <sup>1</sup> Department of Population Health, The University of Texas at Austin, Austin, TX

5 <sup>2</sup> Department of Integrative Biology, The University of Texas at Austin, Austin, TX

6 <sup>3</sup> Department of Quantitative and Computational Biology, University of Southern California, Los Angeles, CA

7 + To whom correspondence should be addressed: [arbelharpak@utexas.edu](mailto:arbelharpak@utexas.edu)

8

## 9 Summary

10 Sex differences in complex traits are suspected to be in part due to widespread gene-by-sex  
11 interactions (GxSex), but empirical evidence has been elusive. Here, we infer the mixture of ways  
12 polygenic effects on physiological traits covary between males and females. We find that GxSex  
13 is pervasive but acts primarily through systematic sex differences in the magnitude of many  
14 genetic effects (“amplification”), rather than in the identity of causal variants. Amplification patterns  
15 account for sex differences in trait variance. In some cases, testosterone may mediate  
16 amplification. Finally, we develop a population-genetic test linking GxSex to contemporary natural  
17 selection and find evidence for sexually antagonistic selection on variants affecting testosterone  
18 levels. Taken together, our results suggest that the amplification of polygenic effects is a common  
19 mode of GxSex that may contribute to sex differences and fuel their evolution.

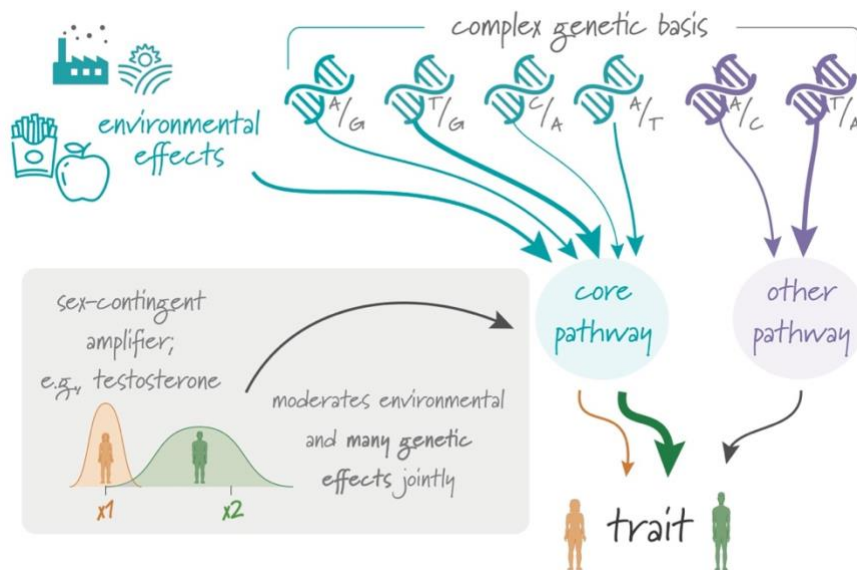

20

## 21 Introduction

22 Genetic effects can depend on context. If the distribution of contexts differs between groups of  
23 people, as they do for males and females, so should the average genetic effects on traits<sup>1,2</sup>. In  
24 particular, such gene-by-sex interaction (GxSex) may be a result of sex differences in bodily,  
25 environmental and social contexts or epistatic interaction with sex chromosomes<sup>3-9</sup>. Sex  
26 differences in genetic effects on complex traits are clearly of high evolutionary<sup>8,10-14</sup> and  
27 translational<sup>9,15-22</sup> importance. Yet with the exception of testosterone levels<sup>23-26</sup>, the basis of  
28 sexual dimorphism in complex traits is not well understood<sup>19</sup>. To date, empirical evidence for  
29 GxSex in GWAS data—whether focused on identifying large GxSex effects at individual loci or by  
30 estimating genetic correlations between the sexes for polygenic traits—has been lacking.

31 Here, we set out to study governing principles of GxSex in complex human traits and  
32 explain why current approaches for characterizing GxSex may be lacking for this goal. We then  
33 suggest a mode of GxSex that may have gone largely underappreciated: A systematic difference  
34 in the magnitude of effect of many variants between the sexes, which we refer to as  
35 “amplification”<sup>27</sup>. Amplification can happen for a large set of variants regulating a specific pathway  
36 if the pathway responds to a shared cue<sup>28-31</sup>. In classic hypothesis-testing approaches that test  
37 for a GxSex effect separately in each variant, the signal of amplification may be crushed under  
38 the multiple hypothesis burden. On the other hand, even state-of-the-art tools designed with  
39 complex traits in mind may miss amplification signals: They often treat genetic correlation  
40 (between GWAS estimates based on samples from two environments) as a litmus test for whether  
41 effects are the same in two groups<sup>32-36</sup>, but correlations are scaleless and thus may entirely miss  
42 amplification effects.

43 We developed a new approach for flexibly characterizing a mixture of male-female genetic  
44 covariance relationships and applied it to 27 physiological traits in the UK Biobank. We found that  
45 amplification is pervasive across traits, and that considering amplification helps explain sex  
46 differences in phenotypic variance. Finally, we consider an implication of polygenic GxSex for  
47 sexually antagonistic selection: Our model confirms that variants that affect traits may be subject  
48 to sexually antagonistic selection when male and female trait optima are very different or,  
49 surprisingly, even if the trait optima are very similar. We developed a novel test for sexually  
50 antagonistic polygenic selection, which connects GxSex to signals of contemporary viability

51 selection. Using this test, we find subtle evidence of sexually antagonistic selection on variants  
52 affecting testosterone levels.

53

## 54 **Results**

55 **The limited scope of single-locus analysis.** We conducted GWASs stratified by sex  
56 chromosome karyotype for 27 continuous physiological traits in the UKB using a sample of ~150K  
57 individuals with two X chromosomes and another sample of ~150K individuals with XY, and a  
58 combined sample that included both the XX and XY samples. We chose to analyze traits with  
59 SNP heritabilities over 7.5% in the combined sample, to have higher statistical power. While there  
60 is not a strict one-to-one relationship between sex chromosome karyotype and biological sex, we  
61 label XX individuals as females and XY individuals as males, and view these labels as capturing  
62 group differences in distributions of contexts for autosomal effects, rather than as a  
63 dichotomy<sup>9,22,37</sup>. Throughout, we analyze GWAS on the raw measurement units as provided by  
64 UKB. (See note on the rationale behind this choice in the section **Amplification of genetic  
65 effects is the primary mode of GxSex**).

66 Among the 27 traits, we observed substantial discordance between males and females in  
67 associations with the trait only for testosterone and waist:hip ratio (whether or not it is adjusted  
68 for BMI; **Fig. S1**). For testosterone, as noted in previous analyses, associated genes are often in  
69 separate pathways in males and females<sup>23,25</sup>. This is reflected in the small overlap of genes  
70 neighboring top associations in our GWAS. For example, in females, the gene CYP3A7 is  
71 involved in the hydroxylation of testosterone, resulting in its inactivation. In males, FKBP4 plays  
72 a role in the downstream signaling of testosterone on the hypothalamus. Both genes, to our  
73 knowledge, do not affect testosterone levels in the other sex.

74 For waist:hip ratio, we saw multiple associations in females only, such as variants near  
75 ADAMTS9, a gene involved in insulin sensitivity<sup>38</sup>. As previous work established<sup>23,25,26</sup>,  
76 testosterone and waist:hip ratio are the exception, not the rule: Most traits did not display many  
77 sex differences in top associations. For instance, arm fat-free mass, a highly heritable dimorphic  
78 trait, showed near-perfect concordance in significant loci (**Fig. S1**). A previous study<sup>26</sup> examining  
79 the concordance in top associations between males and females found few uniquely-associated  
80 SNPs (<20) across the 84 continuous traits they studied; waist:hip ratio was an exception with

81 100 associations unique to one sex. Considering the evidence for the polygenicity of additive  
82 genetic variation affecting many complex traits<sup>39–41</sup>, it stands to reason that looking beyond lead  
83 associations, through a polygenic prism, may aid in the characterization of non-additive effects  
84 (such as GxSex) as well.

85

### 86 **The limited scope of analyzing GxSex via heritability differences and genetic correlations.**

87 We therefore turned to consider the polygenic nature of GxSex, first by employing commonly-  
88 used approaches: comparing sex-specific SNP heritabilities and examining genetic correlations.  
89 We used LD Score Regression (LDSC)<sup>36,42</sup> to estimate these for each trait. In most traits (17/27),  
90 males and females had a genetic correlation greater than 0.9. Testosterone had the lowest  
91 genetic correlation of 0.01, which suggests very little sharing of signals between males and  
92 females (see similar results by Flynn et al.<sup>25</sup> and Sinnott-Armstrong et al.<sup>23</sup>).

93 For the majority of traits (18/27), male and female heritabilities were both greater than the  
94 heritability in a sample that included both sexes. For instance, in arm fat-free mass (right), the  
95 heritability in the both-sex sample was 0.232 ( $\pm 0.009$ ), while the heritabilities for male and female  
96 were 0.279 ( $\pm 0.012$ ) and 0.255 ( $\pm 0.011$ ), respectively. In particular, all body mass-related traits,  
97 excluding BMI-adjusted waist:hip ratio, had greater sex-specific heritabilities (**Fig. 1**).

98 In addition, we noticed a trend in which, as the genetic correlation decreased, the  
99 difference between the heritabilities within each sex and in the sample combining both sexes  
100 tended to become larger (Pearson  $r = -0.88$ , paired t-test p-value =  $10^{-10}$ , **Fig. 1**). Nonetheless,  
101 several traits with genetic correlation above 0.9 also present relatively large sex differences in  
102 heritability: For example, diastolic blood pressure and arm fat-free mass (left) had differences of  
103 5.2% (two-sample t-test p-value =  $3 \cdot 10^{-6}$ ) and 3.4% (two-sample t-test p-value = 0.04),  
104 respectively. These examples are incompatible with a model of pervasive uncorrelated genetic  
105 effects driving sex-specific genetic contributions to variation in the trait (**Table 1**, second model).

106 We therefore considered two other alternative hypotheses under a simple additive model  
107 of variance in a trait. Differences in heritability are either due to sex differences in genetic variance,  
108 in environmental variance, or both. If genetic effects are similar, differences in environmental  
109 variance alone could cause heritability differences (**Table 1**, first model). But as we show in the  
110 **Methods** section, under such a model, the heritability in the combined sample cannot be smaller  
111 than both sex-specific heritabilities.

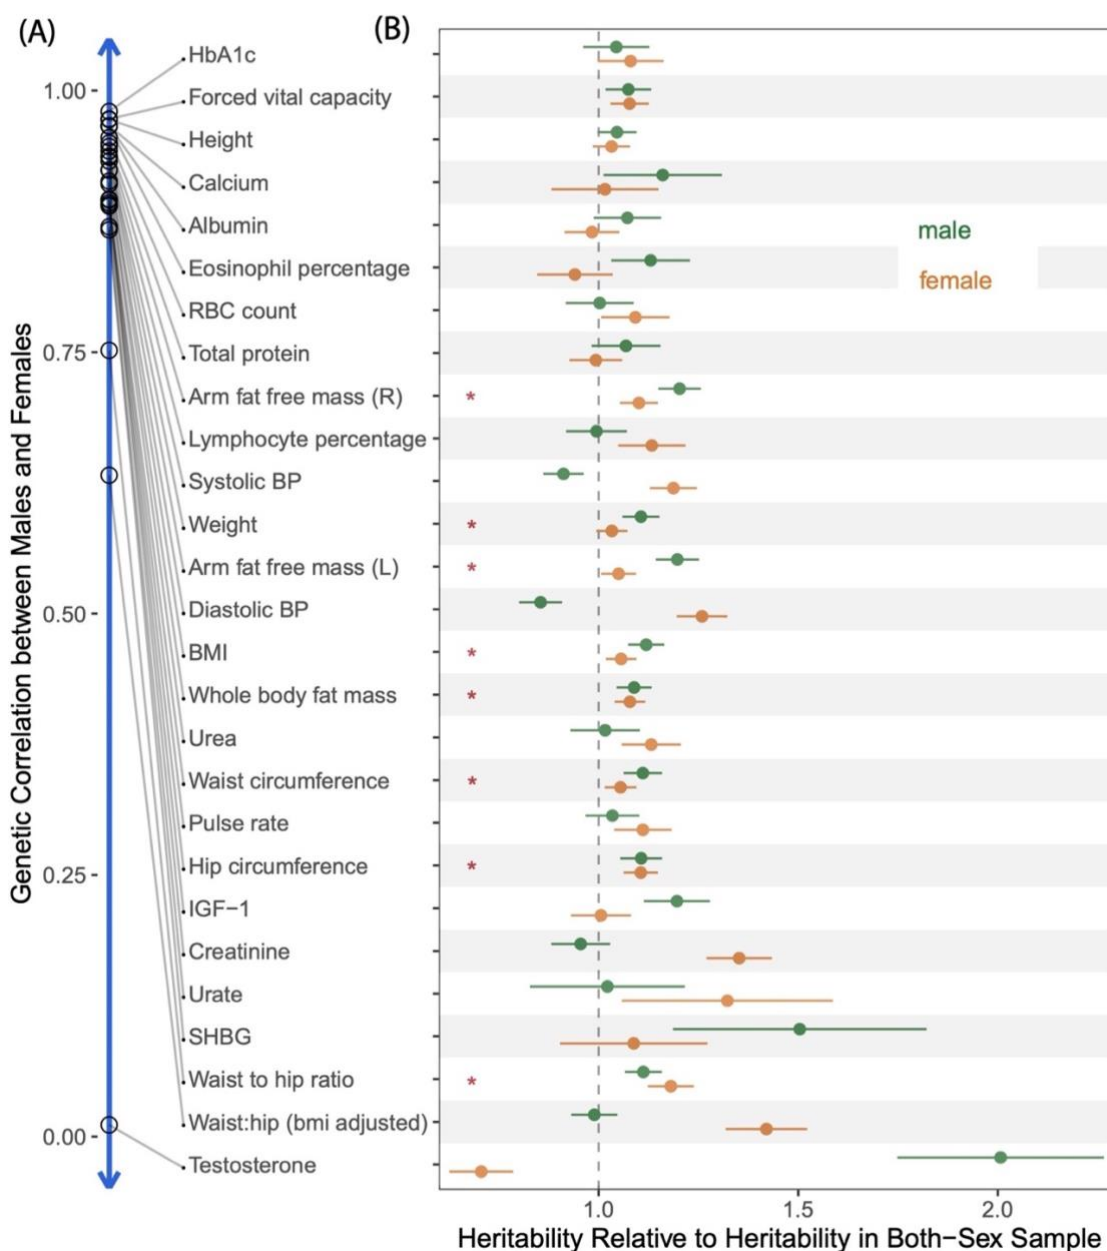

112  
 113 **Figure 1: Heritabilities and Genetic Correlations Cannot Fully Distinguish Models of GxSex. (A)**  
 114 Genetic correlations between the male and females, estimated using bi-variate LD Score Regression, are  
 115 shown in descending order. **(B)** The x-axis represents the relative heritability, i.e., the SNP heritability  
 116 divided by the SNP heritability estimated in the sample with both sexes combined. Red asterisks show  
 117 body-mass related traits with greater heritabilities in both sex-specific samples than in the sample  
 118 combining both sexes.

| Model                                                                | Motivation                                                                                          | Illustration of Effect Covariance | Expectation from Heritability Analysis                                                                                                                                                     |
|----------------------------------------------------------------------|-----------------------------------------------------------------------------------------------------|-----------------------------------|--------------------------------------------------------------------------------------------------------------------------------------------------------------------------------------------|
| No GxSex                                                             | Little previous evidence for GxSex                                                                  |                                   | (a) $h_m^2$ can only differ from $h_f^2$ through environmental variance differences<br>(b) $h_m^2 < h^2$ or $h_f^2 < h^2$                                                                  |
| Weakly or negatively correlated genetic effects                      | Sexual dimorphism is pervasive and heritable contribution is expected to lie primarily in autosomes |                                   | (a) Low or negative genetic correlation<br>(b) $h_m^2, h_f^2 > h^2$ , and the larger the difference, the lower the genetic correlation                                                     |
| Highly correlated effects, difference in magnitude ("amplification") | Response to cues such as testosterone; evidence for GxE in non-human organisms                      |                                   | (a) High genetic correlation<br>(b) $h_m^2 < h^2$ or $h_f^2 < h^2$                                                                                                                         |
| Mixture of covariance relationships                                  | Heritability analysis often incompatible with either model or cannot distinguish between models     |                                   | Compatible with all observations; motivates:<br>(a) Direct estimation of genetic effect covariance, rather than sole reliance on heritability estimates<br>(b) Modeling mixture components |

119  
 120 **Table 1. Polygenic Models of GxSex.** We examine different models of the nature of GxSex in complex  
 121 traits that link to previous studies and motivations. Each model leads to different expectations from the  
 122 analysis of heritability and genetic correlations (**Fig. 1**). The illustrations in the third column depict examples  
 123 of directions and magnitudes of genetic effects, corresponding to each model.  $h_m^2$ ,  $h_f^2$  and  $h^2$  denote narrow-  
 124 sense heritabilities in males, females, and a combined sample, respectively.

125  
 126 Therefore, the observation of higher sex-specific heritabilities for most traits suggests that  
 127 the genetic variance must differ between males and females. Given the random segregation of  
 128 autosomal alleles, independent of an individual's sex chromosome karyotype, and assuming,  
 129 further, that there is little-to-no interaction of sex and genotype affecting participation in the UKB<sup>43</sup>,  
 130 UKB allele frequencies in males and females are expected to be very similar. Thus, this  
 131 observation suggests that causal genetic effects differ between males and females for most traits  
 132 analyzed.

133 A last hypothesis that might tie together the observations in **Table 1** is a less appreciated  
 134 mode of GxSex, amplification. Namely, that the identity and direction of effects are largely shared  
 135 between sexes (leading to high genetic correlation), but the magnitude of genetic effects differs—  
 136 e.g., larger genetic effects on blood pressure in females—which in turn lead to differences in  
 137 genetic variance (**Table 1**, third model).



138 We can test the hypothesis that amplification acts systematically—across a large fraction  
139 of causal variants—by examining the effects of polygenic scores (PGSs), genetic predictors of a  
140 complex trait. Under this hypothesis, regardless of whether the PGS is estimated in a sample of  
141 males, females, or a combined sample of both males and females, it should be predictive in both  
142 sexes, since the causal variants and the direction of their effects are shared and the magnitude  
143 is correlated (**Table 1**, third model). At the same time, in the sex for which genetic effects are  
144 larger, the effect of the PGS is expected to be larger. To evaluate evidence for the systematic  
145 amplification model, we estimated PGSs based on our sex-specific GWASs, and examined their  
146 effect in both sexes. For some traits, like albumin and lymphocyte percentage, the effects of the  
147 same PGS on trait value in males and females were statistically indistinguishable (**Fig. 2A,E,I,J**).  
148 In a few other traits, such as diastolic blood pressure, the result was contingent on the sample in  
149 which the PGS was estimated (**Fig. 2C,G,I,J**). However, for roughly half of the traits examined,  
150 regardless of the sample in which the PGS was derived, the effect of the PGS was predictive in  
151 both sexes yet significantly larger in one of the sexes (17/27 traits with t-test p-value < 0.05 using  
152 the PGS derived from the males sample; 13/27 using the PGS derived from the females sample;  
153 **Fig. 2B,D,F,H,I,J**). These observations are consistent with systematic amplification.

154 The results presented in **Figs. 1,2** suggested to us that various modes of polygenic GxSex  
155 ought to be jointly evaluated. None of the hypothesized rules of thumb (**Table 1**) for interpreting  
156 genetic correlations and sex differences in heritability worked across all traits (see also relevant  
157 discussion in Khrantsova et al.<sup>9</sup>). This motivated us to estimate the covariance between genetic  
158 effects in males and females directly. Another reason to treat covariance of genetic effects  
159 themselves as the estimand of interest is that multiple, distinct GxSex patterns may exist across  
160 subsets of genetic factors affecting a trait (**Table 1**, fourth model).

161  
162 **Flexible model of sex-specific genetic effects as arising from a mixture of covariance**  
163 **relationships.**

164 We set to infer the mixture of covariance relationships of genetic effects  
165 among the sexes directly. We analyzed all traits in their raw measurement units as provided by  
166 the UKB. In particular, we did not normalize or standardize phenotypes within each sex before  
167 performing the sex-stratified GWAS, because sex differences in trait variance may be partly due  
168 to amplification. Standardization would have therefore resulted in masking amplification signals  
that may exist in the data. In some cases, this is indeed the purpose of standardization<sup>44</sup>. More

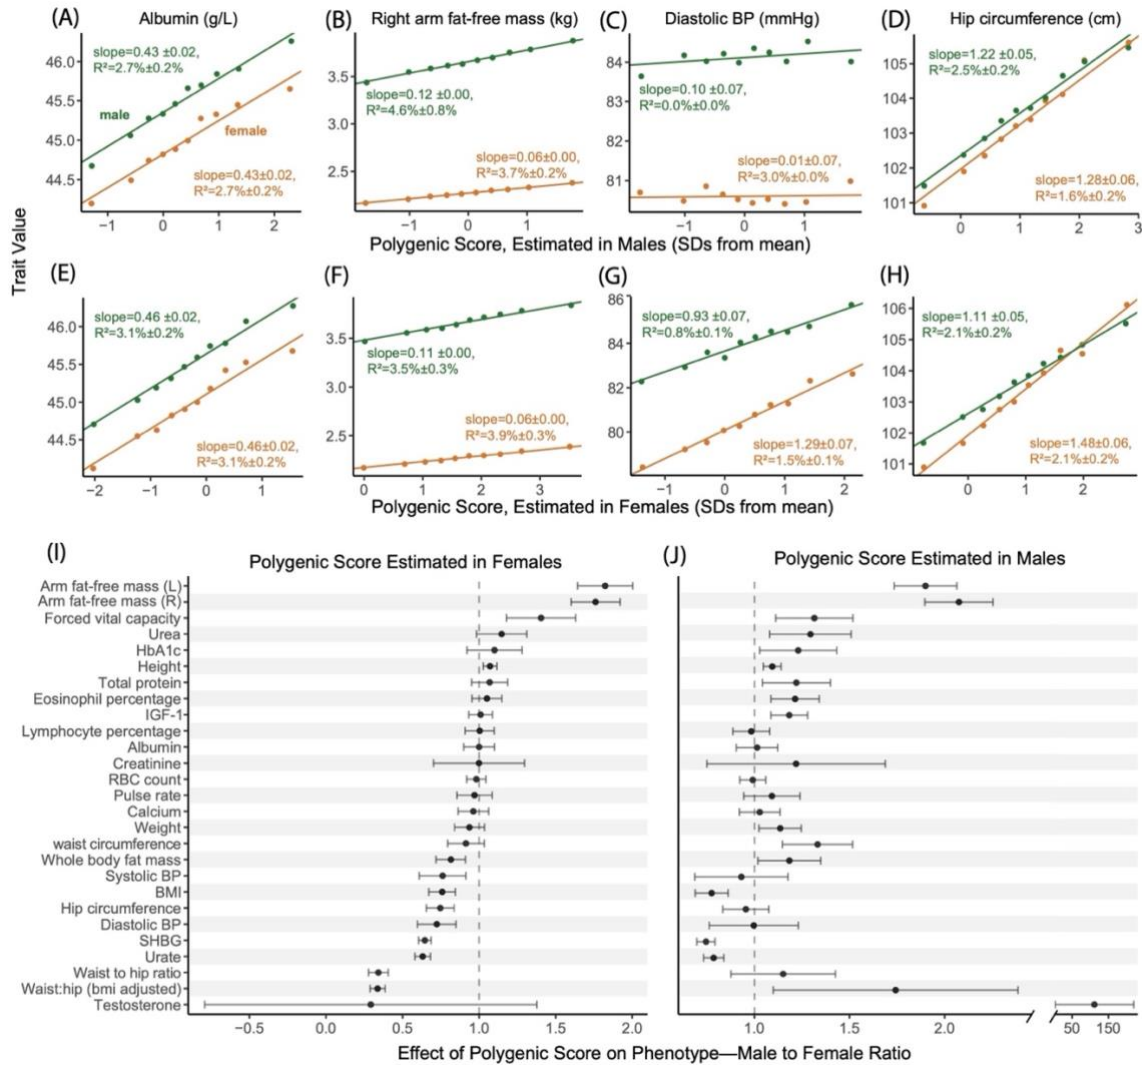

169

170 **Figure 2: Evaluating evidence for systematic amplification. (A-D)** We regressed trait values in males  
 171 (green) and separately in females (orange) on a polygenic score estimated in an independent sample of  
 172 males. Points show mean values in one decile of the polygenic score; the fitted line and associated effect  
 173 estimate and  $R^2$  correspond to regressions on the raw, non-binned data. In some traits, like Albumin (A),  
 174 the polygenic score has a similar effect on the trait in both sexes. In other traits (B,D), the estimated effect  
 175 of the polygenic score differs significantly, consistent with a substantial difference in the magnitude of  
 176 genetic effects of sites included in the polygenic score. **(E-H)** Same analysis as A-D, but with a polygenic  
 177 score pre-estimated in an independent sample of females. **(I-J)** Summary of the ratio of the effect of the  
 178 polygenic score on the trait ( $\pm 2$  SE) in males to the effect in females across physiological traits. See results  
 179 for other traits in **Fig. S12**.



180 generally, while each scaling choice has its merits, we view the measurement of genetic effects in  
181 their raw units as the most biologically interpretable.

182 We used multivariate adaptive shrinkage (*mash*)<sup>45</sup>, a tool that allows the inference of  
183 genome-wide frequencies of genetic covariance relationships. Namely, we model the marginal  
184 SNP effect estimates as sampled (with SNP-specific, sex-specific noise) from a mixture of zero-  
185 centered Normal distributions with various prespecified covariance relationships (2x2 Variance-  
186 Covariance matrices for male and female effects; Eq. 1 in Urbut et al.<sup>45</sup>). Our prespecified  
187 covariance matrices (“hypothesis matrices”) span a wide array of amplification and correlation  
188 relationships, and use *mash* to estimate the mixture weights. Loosely, these weights can be  
189 interpreted as the proportion of variants that follow the pattern specified by the covariance matrix  
190 (**Fig. 3A**). Our covariance matrices ranged from -1 to 1 in between-sex correlation, and 10 levels  
191 of relative magnitude in females relative to males, including matrices corresponding to no effect  
192 in one or both sexes (**Fig. S2**).

193 We first focus on testosterone, for which previous research sets the expectation for  
194 polygenic male-female covariance. In terms of magnitude, the vast majority of effects should have  
195 much greater effect in males. In terms of correlation, we expect a class of genetic effects acting  
196 through largely independent and uncorrelated pathways alongside a class of effects via shared  
197 pathways<sup>23</sup>. Independent pathways include the role of hypothalamic-pituitary-gonadal axis in male  
198 testosterone regulation and the contrasting role of the adrenal gland in female testosterone  
199 production. Shared pathways involve sex hormone-binding globulin (SHBG), which decreases the  
200 amount of bioavailable testosterone in both males and females. As expected, we found that  
201 mixture weights for testosterone concentrated on greater magnitudes in males and largely  
202 uncorrelated effects. Out of the 32% total weights on matrices with an effect in at least one sex,  
203 98% of the weights were placed on matrices representing larger effects in males, including 20.4%  
204 ( $\pm 0.7\%$ ) having male-specific effects (**Fig. 3, S5**).

205 **Amplification of genetic effects is the primary mode of GxSex.** The only trait  
206 of the 27 where a large fraction ( $\geq 10\%$ ) of non-zero effects were negatively correlated was  
207 testosterone (17%). Most effects were instead perfectly or near-perfectly correlated. For example,  
208 diastolic blood pressure and eosinophil percentage had 66% (**Fig. 3**) and 68% (**Fig. S5**) of effects  
209 being perfectly correlated, respectively. Overall, the low weights on matrices representing

210

## Mixtures of covariance relationships of genetic effects between males and females

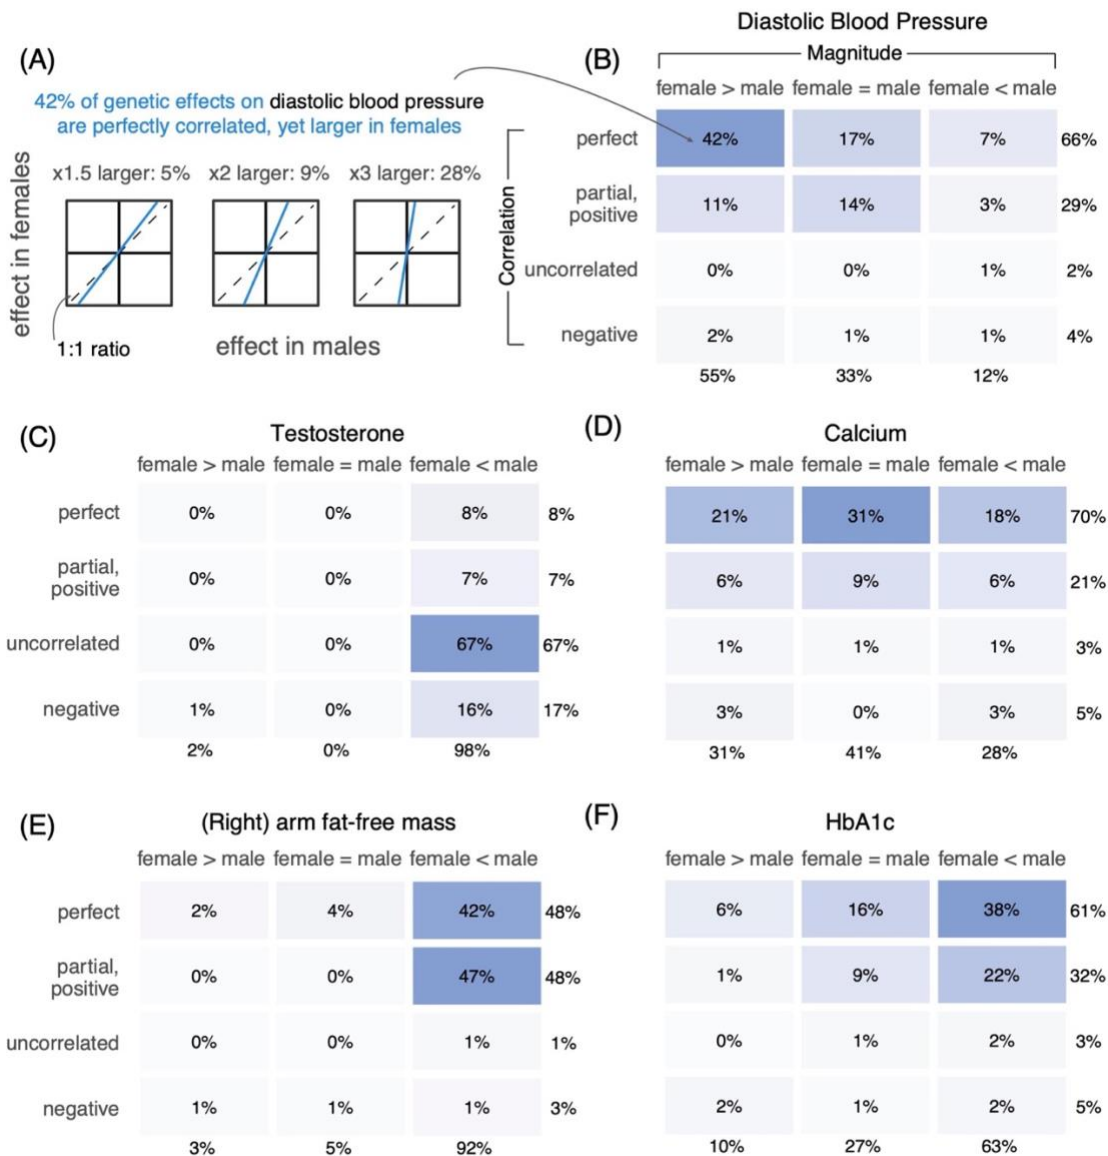

211  
 212 **Figure 3: Polygenic covariance structure between males and females.** (A) Our analysis of the  
 213 polygenic covariance between males and females is based on sex-stratified GWAS. We modelled the sex-  
 214 stratified GWAS estimates as sampled with error from true effects arising from a mixture of possible  
 215 covariance relationships between female and male genetic effects. As an example, shown are illustrations  
 216 for three possible relationships of the same qualitative nature—perfectly correlated effects which are also  
 217 larger in females—and the mixture weights estimated for each in the case of diastolic blood pressure. (B-

218 **F)** Each box shows the sum of weights placed on all covariance relationships of the same qualitative nature,  
219 as specified by relative magnitude (horizontal axis) and correlation (vertical axis) between male and female  
220 effects. The full set of pre-specified covariance matrices is shown in **Fig. S2**, and the weights placed on  
221 each of them for each trait are shown in **Fig. S5**. All weights shown are percentages of non-null weights,  
222 i.e., the weight divided by the sum of all weights except for the one corresponding to no effect in either sex.  
223  
224 negative correlation do not support opposite directions of effects being a major mode of GxSex  
225 (**Fig. S8**).

226 In some traits, such as hemoglobin A1C or diastolic blood pressure, previously considered  
227 non-sex-specific because of high genetic correlations between sexes and a concordance in top  
228 GWAS hits, we find evidence for substantial GxSex through amplification (**Fig. 3B,F; Fig. S5**)<sup>25,26</sup>.  
229 Furthermore, about half (13/27) of the traits analyzed had the majority of weights placed on  
230 greater effects in just one of the sexes (x-axis in **Fig. 4A**). For instance, 92% of effects on BMI-  
231 adjusted waist:hip ratio were greater in females and 92% of effects on (right) arm fat-free mass  
232 were greater in males. Both traits had mixture weights concentrated on highly correlated effects  
233 (**Fig. 3**). We confirmed, using a simulation study, that this summary of sex-biased amplification  
234 indeed captures sex differences in the magnitude of genetic effects and that it is not due to  
235 differences in the extent of estimation noise (e.g., variation in environmental factors independent  
236 of genetic effects; **Figs. S6-7; Methods**).

237 Across traits, the difference between the fraction of male-larger effects and the fraction of  
238 female-larger effects correlates strongly with male-to-female phenotypic variance ratio (Pearson  
239  $r = 0.873$ ,  $p\text{-value} = 6 \cdot 10^{-9}$  after removing testosterone as an outlier; **Fig. 4A**). This observation is  
240 consistent with our hypothesis of amplification leading to differences in genetic variance between  
241 sexes and thereby contributing substantially to sex differences in phenotypic variance. Together,  
242 these observations point to amplification, rather than uncorrelated effects, as a primary mode of  
243 polygenic GxSex.

244 Another important question about the implication of pervasive amplification is whether it is  
245 a major driver of mean phenotypic differences. The ratio between male and female phenotypic  
246 means is correlated with the difference between male-larger and female-larger amplification  
247 (Pearson  $r = 0.75$ ;  $p\text{-value} = 2 \cdot 10^{-5}$  after removing testosterone and BMI-adjusted waist:hip ratio  
248 as outliers). Though this correlation is intriguing, within-sex GWAS aims to explain individual  
249 differences from the mean of the sex, and such GWAS results do not dictate the values of the sex

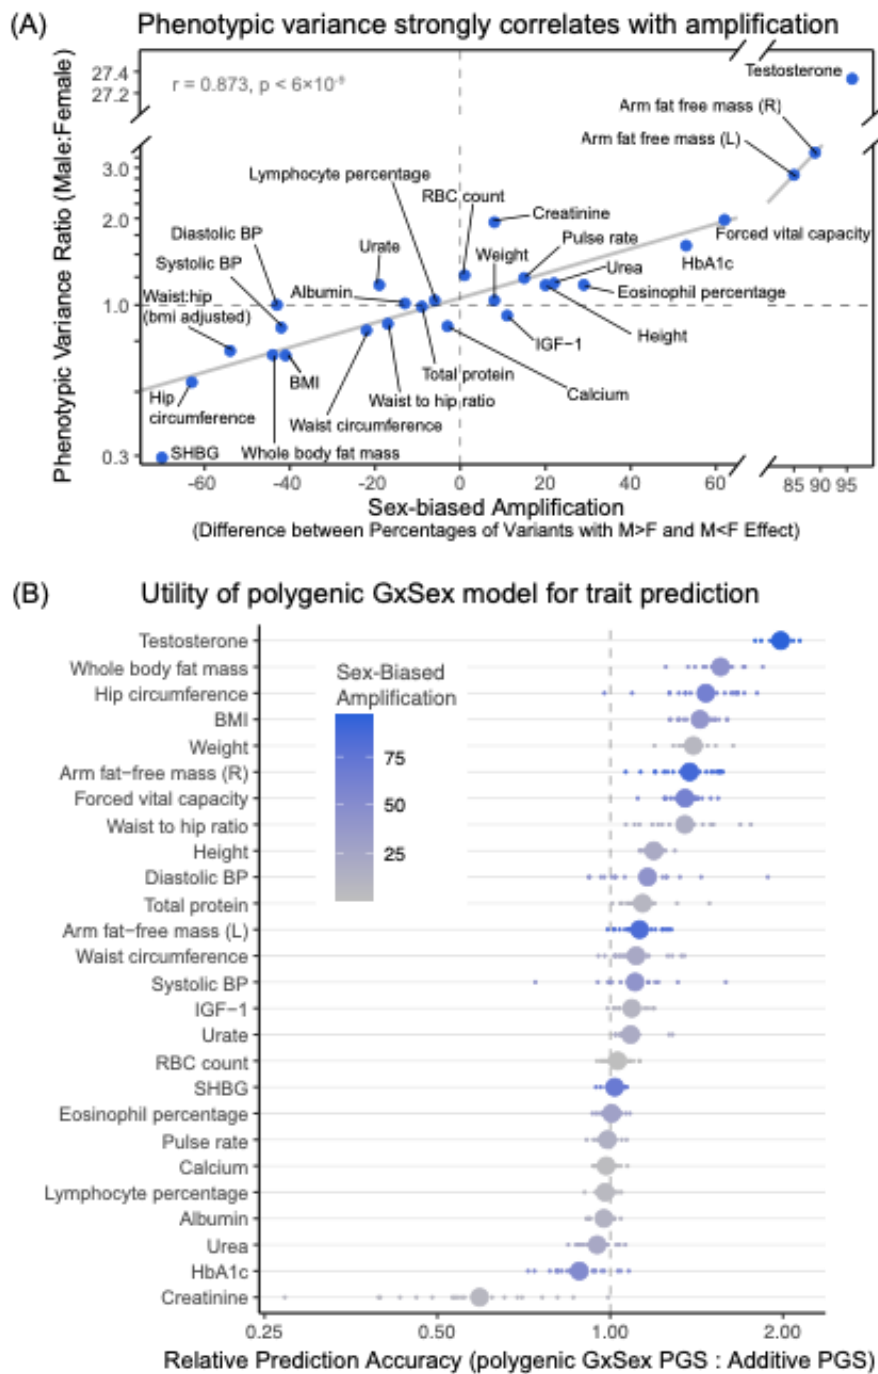

250  
 251 **Figure 4. (A) Phenotypic variance strongly correlates with amplification.** The x-axis summarized the  
 252 “sex-biased amplification” of polygenic effects and is calculated by taking the difference between the sum  
 253 of weights on matrices with male effects greater in magnitude than female effects (M>F) and the sum of

254 weights of M<F matrices. The solid gray line shows a linear fit across traits, excluding testosterone as an  
255 outlier. **(B) Utility of polygenic GxSex model for trait prediction.** The x-axis shows the relative prediction  
256 accuracy estimated from the incremental  $R^2$  ratio of a GxSex model informed by polygenic covariance  
257 patterns and an additive model. For each trait, smaller points show relative prediction accuracy across 20  
258 cross-validation folds, and larger points show the average across the 20 folds. The phenotypes are ordered  
259 by the relative prediction accuracy. The color of each point corresponds to the degree of sex-biased  
260 amplification as described in (A).

261  
262 means. Further, both the ratio of mean trait values between sexes and the difference in  
263 amplification are strongly correlated with phenotypic variance ratios (**Fig. 4A; Fig. S9**; see also  
264 Karp et al.<sup>8</sup>), , and many different causal accounts could explain these correlations.

265 Finally, the pervasiveness of GxSex, alongside the mixture of covariance relationships  
266 across the genome for many traits, may be important to consider in phenotypic prediction. We  
267 compared the prediction accuracy of PGSs that consider the polygenic covariance structure to  
268 that of additive models, that ignore GxSex, as well as models that include GxSex but do not  
269 consider the polygenic covariance structure (**Supplementary Materials; Fig. S13**). Indeed, for  
270 most traits (20/27 traits; **Fig. 4B**), models that consider the polygenic covariance structure  
271 outperform all other models evaluated. Traits which showed better prediction accuracy using the  
272 model that considered polygenic covariance structure included many body mass-related traits  
273 such as BMI and whole body fat mass that also tended to have higher sex-based amplification  
274 (**Fig. 4B**; Pearson  $r = 0.54$ ,  $p = 0.004$  between sex-biased amplification and prediction  
275 accuracy ratio). These results point to the utility of considering polygenic covariance structure in  
276 polygenic score prediction.

277  
278 **Testosterone as an amplifier.** Thus far, we treated the genetic interaction as discretely  
279 mediated by biological sex. One mechanism that may underlie GxSex is a cue or exposure that  
280 modulates the magnitude (and less often, the direction) of genetic effects, and varies in its  
281 distribution between the sexes. A plausible candidate is testosterone. Testosterone may be a key  
282 instigator since the hormone is present in distinctive pathways and levels between the sexes and  
283 a known contributor to the development of male secondary characteristics, so therefore could  
284 modulate genetic causes on sex-differentiated traits.

285 To test this idea, we first binned individuals of each sex by their testosterone levels. Then,  
286 for each trait and within the bin, we quantified the magnitude of total genetic effect as the linear  
287 regression coefficient of trait to a PGS for the trait (**Methods**; see **Fig. S15** for results obtained  
288 using sex-specific PGS). For BMI, testosterone (mean per bin) and the magnitude of genetic  
289 effect were correlated for both males and females (Pearson  $p$ -value  $< 0.05$ ; **Fig. 5A**). For all body-  
290 mass-related traits, there was a negative correlation between the magnitude of genetic effect and  
291 testosterone levels for males and a positive correlation for females (**Fig. 5B**). Since the  
292 relationship with testosterone remains contingent on sex, a model of testosterone as the sole  
293 driver of the observed sex-specificity would be invalid. These observations may help explain  
294 previous reports of positive correlations between obesity and free testosterone in women, and  
295 negative correlations in men<sup>46</sup>. We conclude that in body-mass related traits, testosterone may  
296 be modulating genetic effects in a sexually antagonistic manner.

297 We performed two additional analyses designed to control for possible caveats to the  
298 association of testosterone and the magnitude of polygenic effect: An association test that  
299 controls for possible confounding with age (**Fig. S17**) and a test that mitigates confounding with  
300 other variables or reverse causality (wherein the magnitude of genetic effect affecting the focal  
301 trait causally affecting testosterone levels; **Fig. S16**). The evidence for an effect of testosterone  
302 on the magnitude of polygenic effect did not remain significant in either of these tests. It is  
303 possible, however, that this was due to low statistical power (**Methods**).

304

305 **Are polygenic and environmental effects jointly amplified?** Our results thus far  
306 suggest that polygenic amplification across sexes is pervasive across traits; and that the ratio of  
307 phenotypic variance scales with amplification (**Fig. 4A**). An immediate question of interest is  
308 whether the same modulators that act on the magnitude of genetic effects act on environmental  
309 effects as well (see also relevant discussion by Domingue et al.<sup>47</sup>). Consider the example of  
310 human skeletal muscle. The impact of resistance exercise varies between males and females.  
311 Resistance exercise can be considered as an environmental effect since it upregulates multiple  
312 skeletal muscle genes present in both males and females such as IGF-1, which in turn is involved  
313 in muscle growth<sup>48</sup>. However, after resistance exercise at similar intensities, upregulation of such



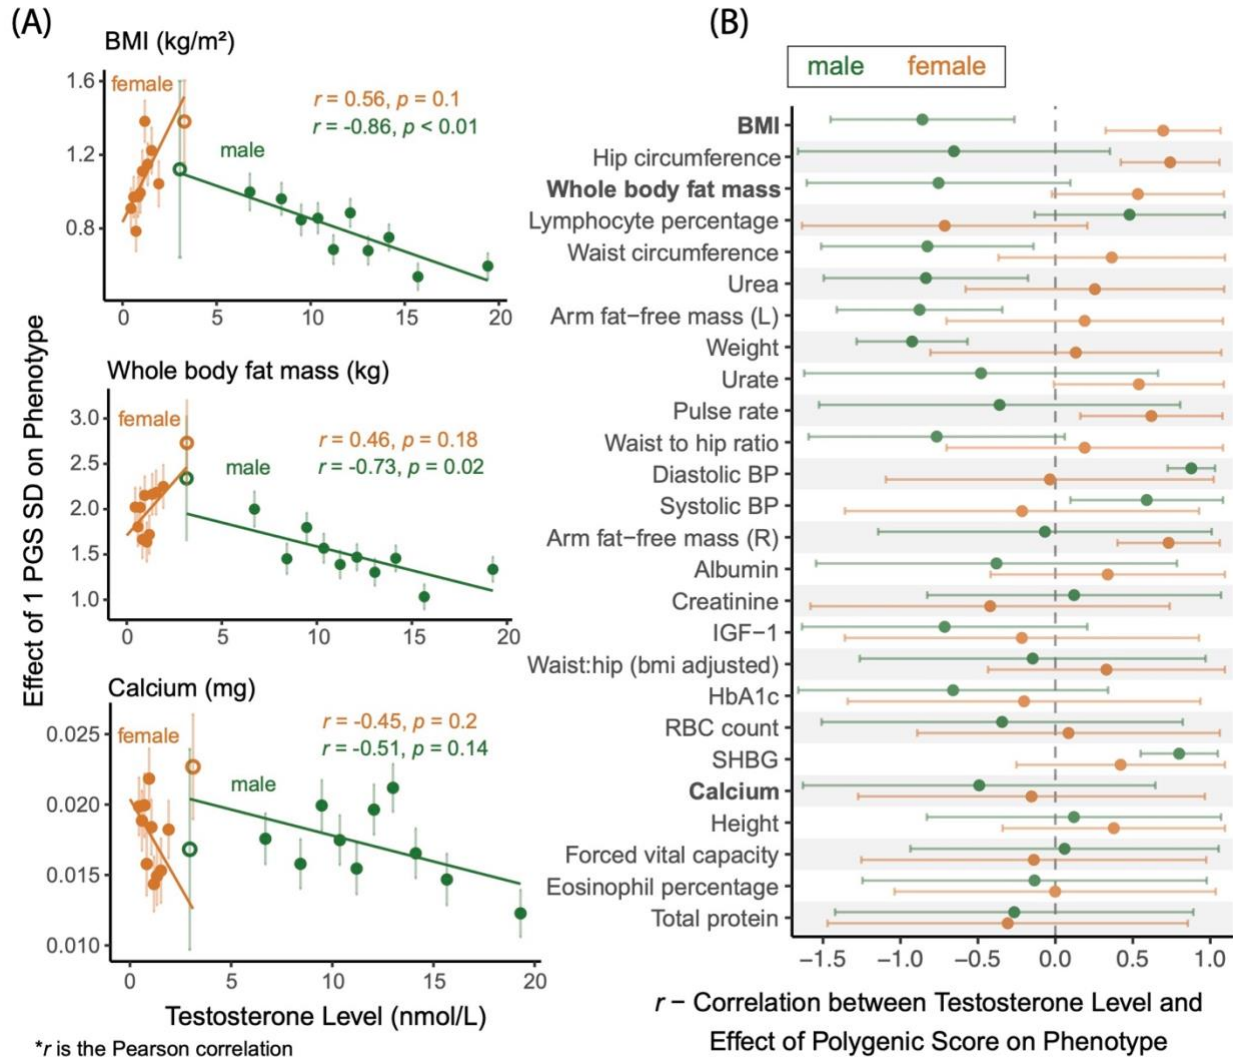

314

315 **Figure 5. Amplification of total genetic effect in relation to testosterone levels. (A)** The relationship

316 between testosterone level bins and estimated magnitude of genetic effect on traits is shown for three traits.

317 The magnitude of genetic effect is estimated using the slope of the regression of phenotypic values to

318 polygenic scores in that bin. The units on the y-axis are effect per standard deviations (SD) of the polygenic

319 scores across all individuals in all bins. The hollow data points are bins with overlapping testosterone ranges

320 between males and females; these are based on fewer individuals (~800 compared to ~2200 in other bins)

321 and not included in the regression. **Fig. S14** show all other traits analyzed. **(B)** The correlation for each sex

322 (90% CI) are shown for all 27 traits. Traits are ordered in descending order of male-female differences in

323 Pearson correlation.

324

325

326

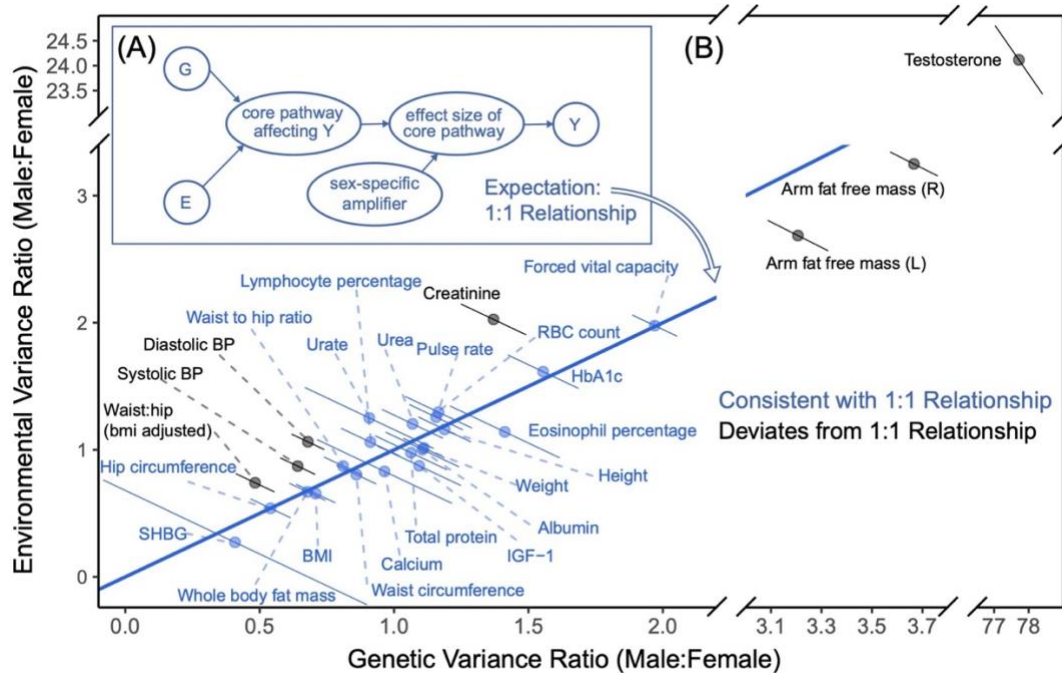

327

328 **Figure 6. Testing a model of pervasive, joint amplification of environmental and polygenic effects.**

329 **(A)** A model of equal amplification of genetic (G) and environmental (E) effect, that produces the sex  
330 differences in the distribution of the phenotype, Y. G and E both act through a core pathway that is amplified  
331 in a sex-specific manner. **(B)** The blue 1:1 line depicts the theoretical expectation under a simple model of  
332 equal amplification of genetic and environmental effects in males compared to females. Error bars show  
333 90% confidence intervals. Traits in blue are consistent (within their 90% CI) with the theoretical prediction.

334 **Fig. S19** shows the same data alongside the predictions under other theoretical models of male-female  
335 variance ratios.

336

337 genes is sustained in males, while levels return sooner to the resting state in females (**Fig. S18**).

338 It is plausible that modulators of the effect of IGF-1, such as insulin<sup>49</sup> or sex hormones<sup>50,51</sup>, drive  
339 a difference in the magnitude of effect of core genes such as IGF-1 in a sex-specific manner. To

340 express this intuition with a model: If amplification mechanisms are shared, then amplification

341 may be modeled as having the same scalar multiplier effect on genetic and environmental effects

342 (**Fig. 6A**). In the **Methods** section, we specify the details of a null model of joint amplification,

343 which yields the prediction that the male-female ratio of genetic variances should equal the

344 respective ratio of environmental variances (blue line in **Fig 6B**).

345 This expectation is qualitatively different from those of two longstanding theoretical “rules  
346 of thumb” predictions for sex differences in trait variance (**Supplementary materials; Fig. S19A;**  
347 of Zajitschek et al.<sup>52</sup>): The “greater male variability” and “estrus-mediated variability” models,  
348 which provide a poor fit across the 27 physiological traits analyzed (**Fig. S19B**).

349 We tested the fit of the theoretical prediction under pervasive joint amplification across  
350 traits. We used our estimates of sex-specific phenotypic variance and SNP heritabilities to  
351 estimate the ratios of genetic and environmental variances. We note that environmental variance  
352 is proxied here by all trait variance not due to additive genetic effects, and caution is advised with  
353 interpretation of this proxy. Twenty of the 27 traits were consistent with the null model of pervasive  
354 joint amplification (within 90% CI; **Fig. 6B**). This finding may suggest a sharing of pathways  
355 between polygenic and environmental effects for these traits (**Fig. 6A**). Interesting exceptions  
356 include diastolic blood pressure—which was the strongest outlier ( $p\text{-value} = 3.06 \cdot 10^{-12}$ , single-  
357 sample z-test), excluding testosterone.

358

359 **Sexually antagonistic selection.** A hypothesized cause of sexual dimorphism is sexually  
360 antagonistic selection, in which some alleles are beneficial in one sex yet deleterious in the  
361 other<sup>11,12,14,53,54</sup>. Sexually antagonistic selection is difficult to study using traditional population  
362 genetics methods because Mendelian inheritance equalizes autosomal allele frequencies  
363 between the sexes at conception, thereby erasing informative signals. One way around this  
364 limitation is to examine allele-frequency differences between the sexes in the current generation,  
365 known as “selection in real time”<sup>14,55,56</sup>. In this section, we consider a model of sexually  
366 antagonistic selection acting on a polygenic trait and use it to estimate the strength of  
367 contemporary viability selection acting on the 27 traits we analyzed.

368 Most theoretical models of sexually antagonistic selection on a trait under stabilizing  
369 selection usually posit either highly distinct male and female fitness optima or genetic variants  
370 affecting traits antagonistically. Our findings on pervasive amplification suggest that variant effects  
371 on traits tend to have concordant signs. Yet, under pervasive amplification, a somewhat surprising  
372 intuition arises: Alleles affecting a trait may frequently experience sexually antagonistic  
373 selection—both in the case in which trait optima for males and females are very distinct (**Fig. 7B**)  
374 and for the case in which they are similar (**Fig. 7A**).

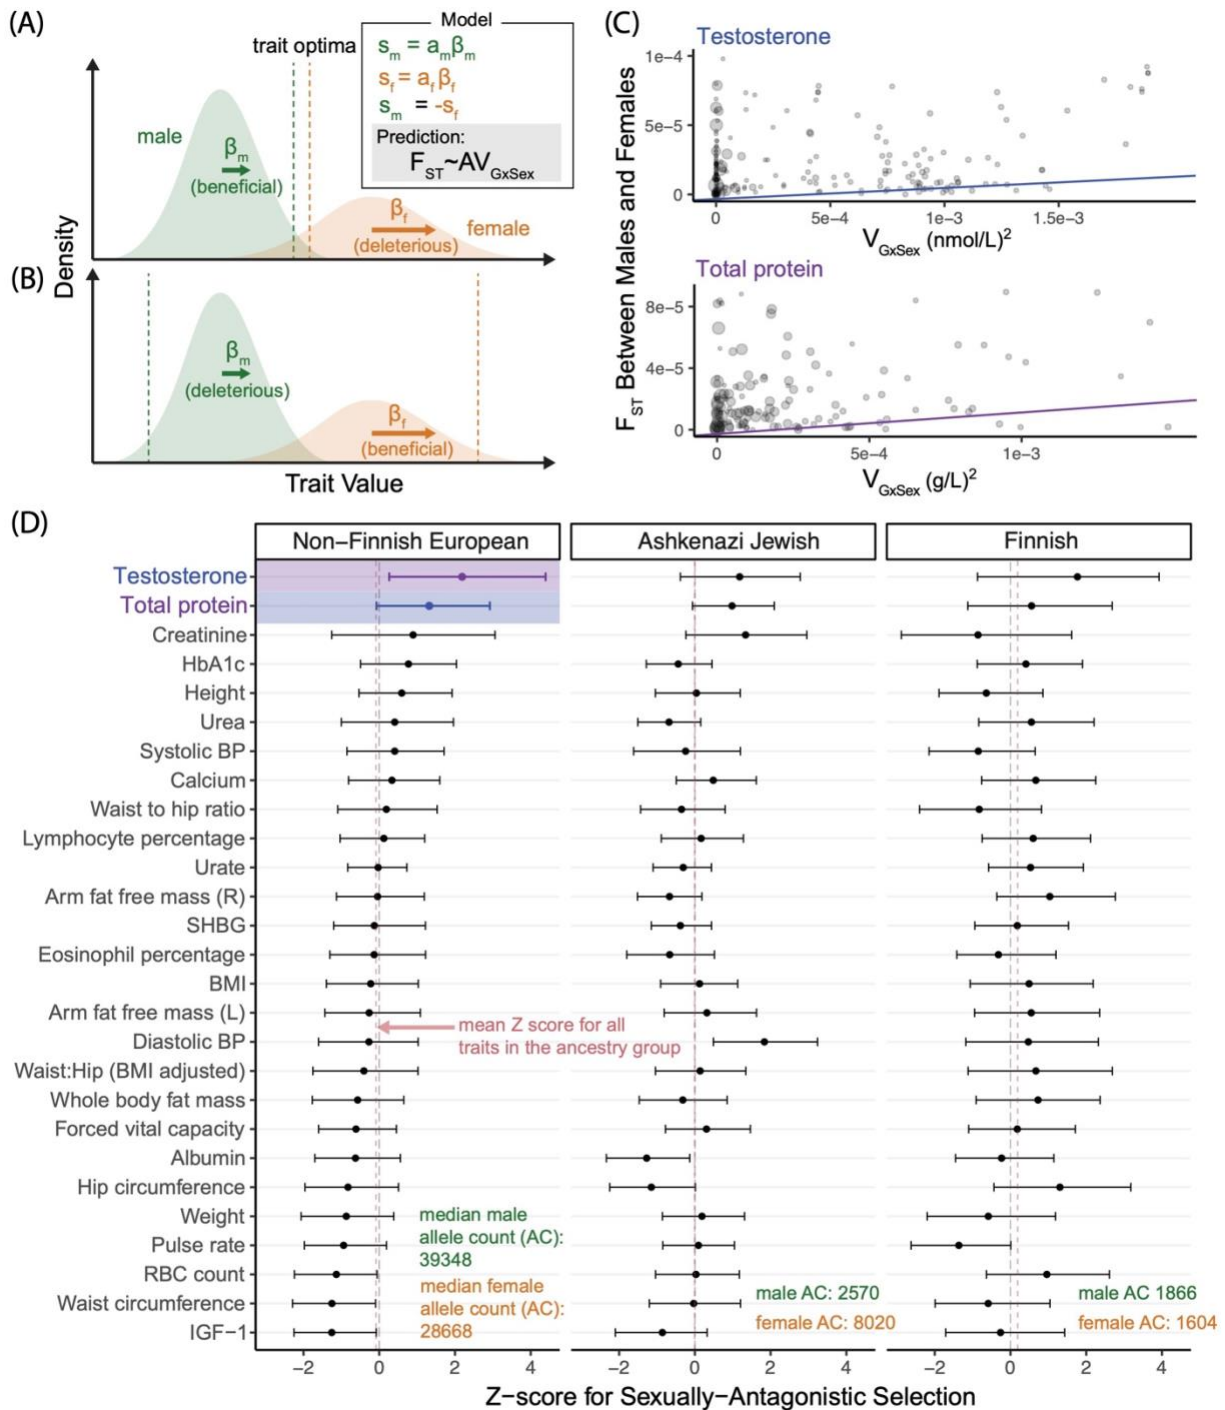

375

376 **Figure 7. Testing for sexually antagonistic selection. (A,B)** A model of sexually antagonistic selection.

377 Selection coefficients,  $s_m$  and  $s_f$ , are linear with the additive effect on the trait in each sex. Sexually

378 antagonistic selection acts such that  $s_m = -s_f$ . The model yields the prediction of **Eq. 1**. In (A), the effect  
379 of an allele tends to drive trait values towards the optimum in males, and away from the optimum in females.  
380 In (B), the fitness optima are farther in males and females; in both examples, selection on acts  
381 antagonistically (i.e., in opposite directions). **(C)** Two examples of the weighted least-squares linear  
382 regression performed to estimate the strength of sexually antagonistic selection on variants associated with  
383 a trait (A in panel A and **Eq. 1**). Each point shows one SNP. Size is proportional to each point's regression  
384 weight. **(D)** Z-scores (90% non-parametric bootstrap CI) estimated through 1000 resampling iterations of  
385 the weighted linear regression of panel B for each trait. The two colored estimates correspond to the  
386 examples in (B).

387  
388 We developed a theoretical model of sexually antagonistic viability selection on a single  
389 trait that builds on this intuition. The model relates sex-specific effects on a complex trait to the  
390 divergence in allele frequency between males and females (measured as  $F_{ST}^{57,58}$ ) due to viability  
391 selection “in real time”, i.e., acting in the current generation between conception and the time of  
392 sampling. We derive the expected relationship for each site  $i$ ,

$$F_{ST_i} \approx AV_{GxS_i} \quad (1)$$

393 where

$$V_{\{GxS\}_i} = 2p_i(1 - p_i)(\beta_i^m - \beta_i^f)^2,$$

394 and  $p_i$ ,  $\beta_i^m$  and  $\beta_i^f$  are the allele frequency of an allele at site  $i$ , its effect on the trait in males and  
395 its effect in females, respectively.  $A$  is a constant parameter shared across all variants and can  
396 therefore be interpreted as the effect of sexually antagonistic selection on male-female divergence  
397 at variants associated with the trait (**Methods**). We estimated  $F_{ST_i}$  for all sites  $i$  across subsamples  
398 of various ancestry groups in the gnomAD dataset<sup>59</sup>. To estimate  $V_{\{GxS\}_i}$  at each site and for each  
399 trait, we used our sex-stratified GWAS results. Since there is large heterogeneity in uncertainty  
400 of GxSex-genetic variance estimates, we use a variance-weighted linear regression to estimate  
401  $A$  (see **Methods** for the derivation of the variance of  $V_{\{GxS\}_i}$  estimates and **Supplementary**  
402 **Materials** for further details).

403 Recent work has shown that apparent sex differences in autosomal allele frequencies  
404 within a sample are often due to a bioinformatic artifact: The mismapping of sequencing reads  
405 from autosomes to sex chromosomes or vice versa<sup>53,60,61</sup>. We identified and excluded sites which  
406 are potentially vulnerable to this artifact (**Supplementary Materials**). In **Fig. 7D**, we only show



407 results for gnomAD subsamples that are the closest in their genetic ancestry to our UKB sample<sup>62</sup>  
408 (results for other subsamples are shown in **Fig. S20,21**). Furthermore, given the concerns of study  
409 recruitment biases<sup>43,60</sup>, we place higher confidence in results that replicate qualitatively across  
410 different subsamples, even though we note that subsample-specific selection signals may be real  
411 since sexually antagonistic selection may act heterogeneously across groups.

412 With these conservative criteria considered, we only find evidence for sexually  
413 antagonistic polygenic selection on testosterone. In the non-Finnish sample, the largest of the  
414 three samples, the null hypothesis  $H_0: A = 0$  in **Eq. 1** is rejected (p-value < 0.05) only for  
415 testosterone (Z score = 2.2). Testosterone is among the three strongest signals in the two other  
416 samples as well, though none of the traits are statistically significant in these samples.

417

## 418 **Discussion**

419 Departing from previous studies that sought GxSex through single loci or heritability analyses, we  
420 modelled GxSex as a mixture of polygenic relationships across the genome. Our analysis  
421 supports pervasive context-dependency of genetic effects on complex traits, acting largely  
422 through amplification. Surprisingly, even for some traits such as red blood cell count, previously  
423 considered non-sex-specific because of high genetic correlations between sexes and a  
424 concordance in top GWAS hits, we find evidence for substantial GxSex. The strong relationships  
425 we find between amplification, environmental variance and phenotypic variance further points to  
426 its potential importance for sex differences.

427 We have shown that considering the polygenic covariance structure, including  
428 amplification signals, improves phenotypic prediction for most traits. Its incorporation in polygenic  
429 scores is straightforward. We therefore recommend its broad application and further building on  
430 our approach to improve clinical risk stratification and other applications of polygenic scores.

431 Our findings may seem at odds with previous reports of GxSex primarily consisting of sex-  
432 limited effects (i.e., no effect in one of the sexes) or antagonistic effects (differences in sign)<sup>63</sup>. In  
433 the **Supplementary Materials** and **Table S6**, we illustrate that these apparent discrepancies may  
434 be rooted in ascertainment biases. Therefore, limiting analyses to variants with outsized sex  
435 differences provides a clouded picture of polygenic GxSex.

436 Localization of GxSex signals can provide clues into the modulators underlying  
437 amplification. Here, we proposed one such modulator, testosterone, and found a correlation



438 between testosterone levels and the magnitude of genetic effect on whole body fat mass. The  
439 opposite signs of these correlations in females and males may reflect the discrepant relationship  
440 between testosterone and these traits at the phenotypic level.

441 Our approach for studying GxSex in complex physiological traits can be adopted to study  
442 the moderation of polygenic effects by other environments. Starting out with sex as an  
443 environmental variable offers a methodological advantage. The study of context-dependency in  
444 humans is often complicated by study participation biases, leading to genetic ancestry structure  
445 that confounds genotype-phenotype associations<sup>43,64–66</sup>, reverse causality between the  
446 phenotype and environment variable, collider bias, gene-by-environment correlation and other  
447 problems<sup>67–69</sup>. Focusing on sex as a case study circumvents many of these “usual suspects”  
448 problems: For example, problems involving the phenotype causally affecting sex are unlikely. This  
449 is an important benchmark for future studies of environmental modulation, both because of the  
450 methodological advantage of sex as an environmental variable and because sex is almost always  
451 measured; so insight into sex differences in genetic effects can be incorporated straightforwardly  
452 in future studies and in clinical risk prediction. Here, we showed that for most of the traits  
453 considered, modeling polygenic GxSex (as opposed to individually estimating sex-specific effects  
454 at each site; **Fig. S13** yields sex-specific predictors that outperform standard additive polygenic  
455 scores.

456 Finally, we developed a model to consider how GxSex may fuel sexually antagonistic  
457 selection in contemporary populations. Over long evolutionary timescales, the two scenarios  
458 depicted in **Fig. 7A,B** may lead to different predictions about the long-term maintenance of GxSex  
459 genetic variance. Regardless, in both cases, alleles that underlie GxSex may experience sexually  
460 antagonistic selection.

461 We found suggestive signals of sexually antagonistic selection on variation associated  
462 with testosterone levels (also see related results by Ruzicka et al.<sup>56</sup>). The signal for our inference  
463 of selection is systematic allele frequency differences between adult males and females, which  
464 are consistent with contemporary viability selection. The severity, age of onset and prevalence of  
465 nearly all diseases are sexually dimorphic<sup>70</sup>. These signals may therefore point to a related  
466 disease that differentially affects lifespan in the two sexes, such as immune system suppression,  
467 diabetes, cancers, and hypertension<sup>71–74</sup>. Recently, high testosterone levels have been linked to  
468 increased rates of mortality and cancer in women, but decreased rates in men<sup>75,76</sup>. However, the

469 testosterone result is also consistent with other accounts, such as testosterone having opposing  
470 effects on propensity to participate in a study in the two sexes. Further validation is therefore  
471 required to better test hypotheses of sexually antagonistic selection, for example in studies with  
472 no recruitment biases (or at least distinct recruitment biases).

473 In this work, we have shown that amplification of the magnitude of polygenic effects may  
474 be important to consider as a driver of sex differences and their evolution. Our approach included  
475 the flexible modelling of genetic effect covariance among the sexes, as well as various  
476 subsequent analyses exploring the implications of these covariance structures. We hope this  
477 study can inform future work on the context-specificity of genetic effects on complex traits.

478

## 479 **Limitations of the Study**

480 Study participation in large biobanks like the UK Biobank (UKB) differs by sex<sup>77</sup>; and work by  
481 Piratsu et al. further argued that allele frequency differences between males and females may  
482 reflect sex-specific recruitment biases<sup>60</sup>. However, a recent study by Benonisdottir and Kong  
483 found no evidence of sex-specific genetic associations with UKB participation<sup>43</sup>, and another by  
484 Kasimatis et al. showed that many apparent associations of autosomal genotypes and biological  
485 sex in the UKB were instead primarily due to a bioinformatic artifact—the mis-hybridization of  
486 autosomal genotyping probes with sex chromosomes<sup>53</sup>. Even still, subtle recruitment biases  
487 affecting male and female participation differently remain a possible caveat to our conclusions.  
488 For the analysis of natural selection in particular, while the replication of signals of selection in  
489 multiple samples may lend credence to our inference, medical datasets based on recruitment of  
490 participants via referring physicians, participation biases may still plausibly be shared across  
491 studies.

492

## 493 **Acknowledgments**

494 We thank the Harpak Lab and Edge Lab members, Ziyue Gao, Tom Juenger, Jonathan Pritchard,  
495 Molly Przeworski, Guy Sella, Jeff Spence and Elliot Tucker-Drob for helpful comments on the  
496 manuscript. We also thank Brian Dilkes, Andrés Bendesky and Jim Fleet for insightful  
497 discussions. We thank Abin Abraham and Tony Capra for their help in implementing code from  
498 Kasimatis et al.<sup>53</sup>, and Michelle Traglia and Lauren Weiss for useful discussions of the relationship

499 between the results reported here and Traglia et al.<sup>63</sup>. This work was supported by NIH  
500 GM116853-07 to M.K. and NIH GM137758 to M.D.E. This study has been conducted using the  
501 UK Biobank resource under application Number 61666, as approved by the University of Texas  
502 at Austin Institutional Review Board, protocol 2019-02-0125.

### 503 **Author Contributions**

504 C.Z., M.J.M. and A.H. designed the experiments. C.Z. and M.J.M. performed the experiments.  
505 C.Z., M.J.M. and A.H. wrote the paper with assistance from all authors. J.M.C., M.D.E and M.K.  
506 provided expertise and feedback.

### 507 **Declaration of Interests**

508 The authors declare no competing interests.

509

## 510 **Methods**

### 511 **RESOURCE AVAILABILITY**

#### 512 **Lead contact**

513 Further information and requests for resources should be directed to and will be fulfilled by the  
514 lead contact, Arbel Harpak ([arbelharpak@utexas.edu](mailto:arbelharpak@utexas.edu))

515

#### 516 **Materials availability**

517 This study did not generate new unique reagents.

518

#### 519 **Data and code availability**

520 This study used genotype and phenotype data from the UK Biobank  
521 <https://www.ukbiobank.ac.uk/>.

522 Sex-specific GWAS summary statistics are available at [Zenodo](#) and are publicly available as of  
523 the data of publication. DOIs are listed in the key resources table.

524 All original code has been deposited at [https://github.com/harpak-lab/amplification\\_gxsex](https://github.com/harpak-lab/amplification_gxsex) and is  
525 publicly available as of the date of publication. DOIs are listed in the key resources table.

526 Any additional information required to reanalyze the data reported in this paper is available from  
527 the lead contact upon request.

528

## 529 **METHOD DETAILS**

530 **UK Biobank sample characteristics.** The UK Biobank is an extensive database that  
531 contains a wide variety of phenotypic and genotypic information of around half a million  
532 participants aged 40-69 at recruitment<sup>78</sup>.

533 In this study, we considered 337,111 individuals who passed quality control (QC) checks,  
534 which included the removal of samples identified by the UK Biobank with sex chromosome  
535 aneuploidy or self-reported sex differing from sex determined from genotyping analysis. We  
536 excluded related individuals (3<sup>rd</sup>-degree relatives or closer) as identified by the UK Biobank in  
537 data field 22020. To reduce potential population structure confounding, we further limited our  
538 sample to individuals identified by the UK Biobank as “White British” in data field 22006. These  
539 are individuals who both self-identified as White and as British and were additionally very tightly  
540 clustered in the genetic principal component space<sup>78,79</sup>. Individuals who had withdrawn from the  
541 UK Biobank by the time of this study were removed. For each phenotype, we also removed  
542 individuals who had missing data for the specified phenotype. These procedures left us with  
543 between 255,426 to 336,551 individuals in the analysis for each trait.

544

545 **Expectations for sex-specific heritabilities with no GxSex.** In the section “The limited  
546 scope of analyzing GxSex via heritability differences and genetic correlations,” we report our  
547 observation that, for most traits examined, sex-specific heritabilities (i.e., estimated independently  
548 from sex-stratified GWAS) were both higher than the heritability in the combined sample. Here,  
549 we explain why this observation is inconsistent with a simple model in which genetic effects are  
550 the same across the sexes.

551 Under a simple additive model of variance in a trait  $Y$  within each sex  $Z$ ,

$$Var[Y|Z] = Var[G|Z] + Var[E|Z], \quad (2)$$

552 where  $Y, G, E$  represent the trait value, additive effect, and environmental effect (including all non-  
553 genetic context aside from sex), respectively. Under this model, the sex-specific heritability  $h_Z^2$  is

$$h_z^2 = \frac{Var[G|Z]}{Var[G|Z] + Var[E|Z]} \quad (3)$$

554 Therefore, sex differences in heritability are either due to sex differences in genetic  
 555 variance, in environmental variance, or both. If genetic effects are equal, differences in  
 556 environmental variance alone could cause heritability differences (**Table 1**, first model). But as  
 557 we show below, the heritability in the combined sample cannot be smaller than both sex-specific  
 558 heritabilities.

559 We assume as before that allele frequencies are highly similar between males and  
 560 females. Since genetic effects are equal, this implies

$$561 \quad Var[G|Z = m] \approx Var[G|Z = f].$$

562 For the environmental variance, we have that

$$\begin{aligned} Var[E] &= \mathbb{E}_Z[Var[E|Z]] + Var_Z[\mathbb{E}[E|Z]] = \mathbb{E}_Z[Var[E|Z]] + 0 = \\ &\mathbb{P}(Z = m)Var[E|Z = m] + \mathbb{P}(Z = f)Var[E|Z = f] \leq \max_{z \in \{m, f\}} Var[E|Z = z]. \end{aligned} \quad (4)$$

563 The first equality follows from the law of total variance. In the second equality, we have  
 564 assumed that there are no mean sex differences in the environmental effects (or, in practice in  
 565 our analysis and as routine in other analyses, that mean phenotypic sex differences have been  
 566 subtracted out), giving

$$567 \quad \mathbb{E}[E|Z = m] = \mathbb{E}[E|Z = f] = \mathbb{E}[E].$$

568 **Eq. 4** shows that the combined environmental variance cannot be greater than the larger of the  
 569 two sex-specific environmental variances. It follows that if the genetic variance is equal in both  
 570 sexes, then the heritability in the combined sample cannot be smaller than both of the sex-specific  
 571 heritabilities,

$$572 \quad h^2 = \frac{Var[G]}{Var[G] + Var[E]} \geq \frac{Var[G]}{Var[G] + \max_{z \in \{m, f\}} Var[E|Z]} = \min_{z \in \{m, f\}} h_z^2. \quad (5)$$

573 **Multivariate adaptive shrinkage (mash).** We used multivariate adaptive shrinkage (*mash*) to  
 574 examine correlation and differences in magnitude of SNP effects between males and females <sup>45</sup>.

575 *mash* is an adaptive shrinkage method<sup>80</sup> that improves upon previous methods of estimating and  
576 comparing effects across multiple conditions by flexibly allowing for a mixture of effect covariance  
577 patterns between conditions and requiring only summary statistics from each condition (including  
578 a point estimate of the effect and corresponding standard error for each SNP and condition). The  
579 method adapts to patterns of sparsity, sharing, and correlation among the conditions to compute  
580 improved effect estimates.

581 In this study, we set two conditions, male and female, and provided effect estimates and  
582 corresponding standard errors from our male-specific and female-specific GWAS. *mash* learns  
583 from the data by estimating mixture proportions of various predefined covariance matrices  
584 representing different patterns in effects. Using maximum likelihood, *mash* assigns low weights  
585 to matrices that capture fewer patterns in the data, and higher weights to those that capture more.

586  
587 **Mixture weights for covariance structure between male and female effects.** To interpret  
588 patterns of SNP effects between males and females, we inputted 66 hypothesis-based covariance  
589 matrices (**Fig. S2**) spanning a range of correlations and relative magnitudes of effects between  
590 males and females. We used a random subset of all SNPs for *mash* to learn the covariance  
591 mixture weights. In order for the random subset to contain approximately independent SNPs and  
592 capture the weight of SNPs with no effect (**Fig. S2**), we created a subset of SNPs for each trait  
593 by taking a random SNP from each of 1703 approximately independent LD blocks estimated for  
594 Europeans<sup>81</sup>. *mash* can also generate data-driven covariance matrices that capture SNP effects  
595 in the data, but we did not use this feature since the data-driven matrices had negligible  
596 differences from our hypothesized matrices (in terms of  $\ell_2$  norm) and were less interpretable.  
597 For each trait, we repeat this weight-learning step 100 times, sampling the SNPs from the 1703  
598 LD blocks without replacement to fit the *mash* model and generate mixture proportions. We then  
599 take the average proportion for each covariance matrix as an estimate of its weight, effectively  
600 treating each of the 100 samples as i.i.d. draws.

601  
602 **Choice of SNPs used to estimate male-female effect covariance.** We examined the  
603 effect of using a random subset taken from different p-value thresholds [1, 5e-2, 1e-5, 5e-8] while  
604 selecting from LD blocks. By doing so, we can examine differences in the distribution of weights  
605 across the p-value thresholds. We performed this test on height, BMI, testosterone, and BMI-



606 adjusted waist:hip ratio. For each trait, weight placed on the no-effect matrix decreased as we  
607 reduced the p-value threshold (**Fig. S4A**). Patterns of weights for non-null effect matrices varied  
608 across the traits (**Fig. S4B,C**). Since *mash* considers the proportion of null effects and sex-  
609 specific, SNP-specific noise; together with the fact that for complex traits, less significant  
610 associations may still reflect valuable signal, we decided on using the whole set of SNPs to  
611 sample from when estimating mixture proportions.

612

### 613 **Simulating equal genetic effects and heterogeneous estimation noise among the sexes.**

614 To ensure that *mash* was not mistaking sex differences in estimation noise (e.g. via  
615 differences in the extent of environmental variance) to be differences in the magnitude of genetic  
616 effects, we performed a simulation study. In short, samples of males and females were generated  
617 under the model given by **Eq. 2**. Genetic effects were set as equal, but the environmental variance  
618 differed among the sexes. We then perform a GWAS on both samples and input the simulated  
619 GWAS results into *mash*, and test whether the estimated mixture weights spuriously suggest the  
620 presence of GxSex. We performed this simulation on a grid of parameters, including heritabilities  
621 in males set to either 5% or 50%, female to male environmental variance ratio of 1, 1.5 or 5; and  
622 100, 1,000 or 10,000 causal SNPs.

623 First, we created a sample of 300K individuals with randomly assigned sex. We then  
624 sampled genotypes for all individuals consisting of 20K SNPs by sampling from the observed  
625 distribution of allele frequencies from UK Biobank's imputed data<sup>82</sup>, assuming linkage equilibrium.  
626 From the 20K SNPs, we portioned out the predetermined number of causal SNPs and assigned  
627 effect sizes by sampling from a Standard Normal distribution. We estimated the male  
628 environmental variance for each causal SNP using the equation,

$$629 \text{Var}[E|Z = m] = \frac{\text{Var}[G|Z = m](1 - h_m^2)}{h_m^2} = \frac{(\sum_{i=0} \beta_i^2 2p_i(1 - p_i))(1 - h_m^2)}{h_m^2} \quad (6)$$

630 where  $\text{Var}[E|Z = m]$  is the simulated environmental variance for males,  $G|Z = m$  is a vector of  
631 the genetic effects in males,  $h_m^2$  is the heritability in males and  $\beta_i$  and  $p_i$  are the effect size and  
632 allele frequency at site  $i$ , which are equal for males and females. We multiplied  $\text{Var}[E|Z = m]$   
633 by the predetermined environmental variance ratio to obtain the environmental variance for  
634 females  $\text{Var}[E|Z = f]$ . Afterwards, for each individual  $j$  with sex  $z_j$ , we sampled the  
environmental effect  $E_j$  as

$$E_j \sim N(0, \text{Var}[E|Z = z_j]).$$

635

636 Phenotypes were then set using the following additive model,

$$y_j = \sum_{i=0} \beta_i x_{ij} + E_j \quad (7)$$

637 where  $y_j$  is the phenotypic value for individual  $j$  and  $x_{ij}$  is the number of effect allele copies at the  
638  $i^{\text{th}}$  causal SNP for the  $j^{\text{th}}$  individual. With the phenotype, genotype and environmental effect set,  
639 we obtained the estimated effect sizes,  $\{\hat{\beta}_i\}$ , using least squares simple linear regression for all  
640 20K SNPs and used the estimated effect sizes and corresponding standard errors as input into  
641 *mash*.

642 For nearly all parameters, out of the weights on matrices other than the null matrix, the  
643 vast majority was placed on the matrix for perfect correlation, equal magnitude (**Fig S6**). As the  
644 number of causal SNPs increased, the weight on the no-effect covariance matrix decreased  
645 accordingly. These results suggest that *mash* was not grossly mistaking differences in  
646 environmental variance as amplification.

647

648 **Simulating sex-biased amplification.** To evaluate whether *mash* accurately  
649 captures sex-biased amplification of genetic effects (a measure we have used in the x-axis of **Fig.**  
650 **4A,B**), we followed the same simulation procedure described in the Section "Simulating equal  
651 genetic effects and heterogeneous estimation noise among the sexes". However, instead of using  
652 equal genetic effects in males and females, we sampled genetic effects from pre-specified  
653 covariance matrices (**Fig. S7** left-hand panel). We set the female to male environmental variance  
654 ratio as 1.2 and the heritability as 0.5. We generated data from (A) a model in which all genetic  
655 effects are sampled from a matrix where male and female effects are equal, (B) a model in which  
656 86% of the genetic effects are sampled from a matrix where effects between the sexes are equal,  
657 and 14% of the effects are sampled from a matrix where the female effect size magnitude is 4  
658 times that of males, and (C) a model in which 86% of effects are sampled from a matrix where  
659 effects between sexes are equal, and 14% of effects are sampled from a matrix of only female-  
660 specific effects. After simulating sex-specific GWAS on the three models, we input the results into

661 *mash* to estimate mixture weights. We repeated this simulation procedure 100 times for each  
662 model.

663 For model (A), the equal effect matrix received 78% of the weight, and the difference  
664 between male-larger and female-larger magnitude was 1% (**Fig. S7**). For model (B), 67% of the  
665 weight was placed on the matrix for equal effects. The weight difference between male-larger and  
666 female-larger magnitude was 13%. In model (C), 69% of the weight was on the matrix for equal  
667 effects, and the difference between male-larger and female-larger magnitude was 16%. These  
668 simulation results therefore suggest some overestimation of the proportion of SNPs with  
669 magnitude differences. However, the measure of “sex-biased amplification” matched that of the  
670 pre-specified generative models up to an error of 2%. Therefore, the simulations suggest “sex-  
671 biased amplification” is measured accurately in our estimation procedure.

672  
673 **Testosterone as an amplifier.** We tested a model of testosterone as a modulator of  
674 magnitude differences in males and females. We first split individuals by sex and for each sex,  
675 created 10 bins of testosterone levels. We adjusted one of the 10 bins to have testosterone levels  
676 overlap between males and females. The overlapping testosterone bin was based on fewer  
677 individuals (~800) compared to the other bins (~2200). For each trait, each of the sexes, and  
678 within each bin, we performed a simple linear regression of trait values to the PGS for the trait  
679 (using a PGS based on both-sex summary statistics (**Supplementary Materials**)). We interpret  
680 the estimated coefficient for the effect of the PGS as a proxy for the magnitude of polygenic effect.  
681 Finally, we summarized the relationship between testosterone level and magnitude of polygenic  
682 effect across bins using the Pearson correlation between the two.

683 To mitigate the possible effects of confounding (of testosterone and magnitude of  
684 polygenic effect) or reverse causation (the magnitude of polygenic effect on the focal trait causally  
685 affecting testosterone levels) we employed a version of Mendelian Randomization<sup>83,84</sup> of the same  
686 analysis (**Fig. S16**). Namely, we replaced testosterone levels of each individual with their PGS for  
687 testosterone. Here, given the near-zero genetic correlation between males and females, we used  
688 our sex-specific PGS for each sex; otherwise, the analysis is unchanged.

689 We also examined whether participants’ age may have confounded the relationship  
690 between testosterone and polygenic effect. In this analysis, instead of using the polygenic effect

691 as the response variable across bins, we used the polygenic effect residualized for mean age in  
692 the bin and examined the effect of an individual's polygenic score on the residual (**Fig. S17**).

693

694 **Model of Shared Amplification.** Here, we suggest a null model in which amplification is  
695 shared between genetic and environmental effects. We then suggest a prediction that the model  
696 yields and explain how we tested this prediction across traits (**Fig. 6**).

697 If an amplifier is shared, it may be modeled as having the same scalar multiplier effect on  
698 genetic and environmental effects. Consider the within-sex additive model of **Eq. 1** in the section  
699 "The limited scope of analyzing GxSex via heritability differences and genetic correlations" above.  
700 For a phenotype value  $Y_z$  in sex  $z \in \{m, f\}$

$$Y_z = c + G_z + E_z, \quad (8)$$

701 Where  $c$  is a constant,  $E_z$  is the environmental effect and

$$G_z = \sum_{\text{site } i} x_i \beta_i^z \quad (9)$$

702 is the polygenic effect where  $\beta_i^z$  is the effect of an allele at site  $i$  (say the minor allele) in sex  $Z$   
703 and  $x_i$  is the number of copies of the allele. We assume here for simplicity that male genetic  
704 effects relate to female effects solely through a shared polygenic amplification constant,  $\alpha$ ,

$$\beta_i^m = \alpha \beta_i^f \quad \forall i; \alpha > 0. \quad (10)$$

705 Allele frequencies are once again assumed to be close to equal between males and  
706 females, since due to random segregation of alleles during meiosis, genotype frequencies at  
707 autosomal sites are independent of sex; and further assuming no substantial interaction between  
708 genotype and sex affecting participation in UKB<sup>43</sup>. Consequently, differences in polygenic effect  
709 distributions between males and females are solely based on GxSex, and thus:

$$\text{Var}[G_m] = \alpha^2 \text{Var}[G_f]. \quad (11)$$

710 The model we would like to test is one where the amplification of environmental effects  
711 can also be simplified to the same scalar multiplier,

$$E_m = \alpha E_f, \text{ and} \quad (12)$$
$$\text{Var}[E_m] = \alpha^2 \text{Var}[E_f].$$

712 Hence, with equal amplification,

$$\frac{Var[G_m]}{Var[G_f]} = \frac{Var[E_m]}{Var[E_f]} \quad (13)$$

713

714 To test the model of shared amplification between environmental and polygenic effects  
715 (**Eq. 8**) we obtained the genetic and environmental variance for males and females based on the  
716 following relationships,

$$Var[G_z] = h^2 Var[Y_z] \quad (14)$$

717 and

$$Var[E_z] = (1 - h^2) Var[Y_z], \quad (15)$$

718 where  $Var[G_z]$ ,  $Var[E_z]$ , and  $Var[Y_z]$  are the additive genetic, environmental, and phenotype  
719 variances, respectively. Estimates of the sex-specific heritabilities,  $h_z^2$ , were obtained from  
720 previous estimates using LD Score Regression (**Supplementary Materials**).

721 Representing male genetic or environmental variance as  $x$ , and the corresponding female  
722 variance as  $y$ , we derived standard errors for the ratio of male to female variance using the 2<sup>nd</sup>-  
723 order Taylor approximation for the standard error of a ratio of estimators of  $x$  and  $y$ ,

$$SE\left[\frac{\hat{x}}{\hat{y}}\right] = \sqrt{Var\left[\frac{\hat{x}}{\hat{y}}\right]} \cong \frac{E[\hat{x}]}{E[\hat{y}]} \sqrt{\frac{Var[\hat{x}]}{E[\hat{x}]^2} + \frac{Var[\hat{y}]}{E[\hat{y}]^2} - \frac{2Cov[\hat{x}, \hat{y}]}{E[\hat{x}]E[\hat{y}]}} \approx \frac{\hat{x}}{\hat{y}} \sqrt{\frac{SE[\hat{x}]^2}{\hat{x}^2} + \frac{SE[\hat{y}]^2}{\hat{y}^2}} \quad (16)$$

724 assuming independence between  $\hat{x}$  and  $\hat{y}$  since they are statistics of independent sampling  
725 distributions (independent samples of males and females). The standard errors of the genetic and  
726 environmental variance were estimated using the law of total variance for a product of two random  
727 variables. For  $\hat{a}$  and  $\hat{b}$ , unbiased estimators of the two parameters  $a$  and  $b$ , respectively, we get

$$SE[\hat{a}\hat{b}] = \sqrt{SE[\hat{a}]^2 SE[\hat{b}]^2 + E[\hat{a}]^2 SE[\hat{b}]^2 + E[\hat{b}]^2 SE[\hat{a}]^2}.$$

728 Plugging in the point estimate  $\hat{a}$  for  $E[\hat{a}] = a$  and the point estimate  $\hat{b}$  for  $E[\hat{b}] = b$ ,

$$\widehat{SE}[\hat{a}\hat{b}] = \sqrt{SE[\hat{a}]^2 SE[\hat{b}]^2 + \hat{a}^2 SE[\hat{b}]^2 + \hat{b}^2 SE[\hat{a}]^2}. \quad (17)$$

729 In this case,  $a$  represents the phenotypic variance for a sex,  $Var[Y_z]$ , and  $b$  represents  
 730 either  $h_z^2$  for estimation of genetic variance or  $(1 - h_z^2)$  for estimation of environmental variance.  
 731 Lastly, to obtain the standard error of the phenotypic variance, we used 100 bootstrapped  
 732 samples  $Var[Y_z]_i$  of estimates of the phenotypic variance in sex  $z$ ,

$$\widehat{SE}[\hat{a}] = \sqrt{\frac{\sum_{i=1}^{100} (Var[Y_z]_i - \overline{Var[Y_z]})^2}{100 - 1}}$$

733 Finally, for each trait, we estimated  $\tilde{Z}$ , the ratio of the two male-female ratios  
 734 (environmental and genetic, y and x axes in **Fig. 6**, respectively), and its standard error,  $SE[\tilde{Z}]$ ,  
 735 using the same method as in **Eq. 16**. Under the null hypothesis of equal environmental and  
 736 genetic amplification (**Eq. 8**),

$$H_0: E[Z] = 0, \quad (18)$$

737 where

$$Z = \frac{\tilde{Z} - 1}{SE[\tilde{Z}]}$$

738 In **Fig. 6**, we approximated 90% confidence intervals on  $Z$  by treating it as a  $Z$  score, i.e.,  
 739 further treating  $Z$  as a Standard Normal.

740

741 **A Model of Sexually antagonistic Selection.** We developed a model relating sex  
 742 differences in additive effects on a trait at a biallelic locus ( $\beta_m$  and  $\beta_f$ ) and divergence in allele  
 743 frequencies. Our model resembles that of Cheng and Kirkpatrick<sup>14</sup> who developed a similar model  
 744 relating allele-frequency differences and sex bias in gene expression. In short, we modelled  
 745 sexually antagonistic, post-conception viability selection on a focal complex trait. We assumed  
 746 allele frequencies in adult males,  $p_m$ , and adult females,  $p_f$ , are at equilibrium, i.e. do not change  
 747 in consecutive generations. Under these conditions, we derive the relationship

$$F_{ST} \approx AV_{GxSex},$$

748 where  $F_{ST}$ <sup>57</sup> is the fixation index with respect to the male and female subpopulations, i.e., the  
 749 proportion of heterozygosity in the population that is due to allelic divergence between the sexes.  
 750  $V_{GxSex}$  is defined as

$$V_{GxSex} := 2p(1 - p)(\beta_m - \beta_f)^2, \quad (19)$$



751 where  $p$  is the allele frequency in zygotes.  $A$  is a parameter that, importantly, is shared across all  
 752 variants affecting the trait and can be thought of as the intensity of sexually antagonistic selection  
 753 acting on genetic variation for the trait in question.

754 In our model, allele frequencies at the autosomal locus are assumed to be equal in males  
 755 and female zygotes.  $F_{ST}$  at adulthood takes the form

$$F_{ST} := \frac{\text{Var}_z[p_z]}{\bar{p}(1-\bar{p})} = \frac{E[p_z^2] - \bar{p}^2}{\bar{p}(1-\bar{p})} = \frac{p_m^2 + p_f^2 - \left(\frac{p_m + p_f}{2}\right)^2}{\bar{p}(1-\bar{p})} = \frac{(p_m - p_f)^2}{4\bar{p}(1-\bar{p})}, \quad (20)$$

756 where

$$\bar{p} = \frac{p_m + p_f}{2}.$$

757 If we further assume a near-1:1 sex ratio such that  $\bar{p} \approx p$ ,

$$F_{ST} \approx \frac{(p_m - p_f)^2}{4p(1-p)}. \quad (21)$$

759 Sexually antagonistic selection acting on viability will cause divergence in allele  
 760 frequencies between adult males and females. We write the relative viabilities of the homozygote  
 761 for the reference allele, the heterozygote and the homozygote for the effect allele as  $1 :: 1 +$   
 762  $d_z S_z :: 1 + S_z$  for each sex  $z \in \{m, f\}$ . The selection coefficient  $S_z$  and dominance coefficient  $d_z$   
 763 can be frequency-dependent, in which case these coefficients take their values at equilibrium. We  
 764 can write the additive selection coefficient of the effect allele as

$$s_z = [p + (1 - 2p)d_z]S_z. \quad (22)$$

765 Assuming that zygotes are at Hardy-Weinberg equilibrium, the allele frequency in each  
 766 sex at adulthood is

$$p_z \approx p + p(1-p)s_z, \quad (23)$$

767 where we neglected terms of order  $s_z^2$ <sup>85</sup>. Plugging **Eq. 23** into **Eq. 21**, the divergence between  
 768 males and females post-selection is

$$F_{ST} \approx \frac{1}{4}p(1-p)(s_m - s_f)^2. \quad (24)$$

769 We model the strength of viability selection acting on males and females as linear with the  
 770 additive effect on a focal trait in each sex,

$$s_z = a_z \beta_z, \quad (25)$$

771 and recalling the simplifying assumption that allele frequencies are at equilibrium under sexually  
 772 antagonistic viability selection at the locus, such that selection favoring an allele in one sex is  
 773 balanced by selection against that allele in the other sex,

$$s_f = -s_m. \quad (26)$$

774 If  $\beta_m = \beta_f$ , then **Eq. 24** simplifies to

$$F_{ST} \approx p(1-p)(a_f\beta_f)^2 = \frac{a_f^2}{2}V_G. \quad (27)$$

775 where

$$V_G = 2p(1-p)\beta_f^2. \quad (28)$$

776 is the additive genetic variance. However, when  $\beta_m$  does not strictly equal  $\beta_f$ , **Eq. 25, 26** together  
 777 imply

$$\beta_m + \beta_f = \frac{\beta_m + \beta_f}{\beta_m - \beta_f}(\beta_m - \beta_f) = \frac{\frac{s_m}{a_m} - \frac{s_m}{a_f}}{\frac{s_m}{a_m} + \frac{s_m}{a_f}}(\beta_m - \beta_f) = \frac{a_f - a_m}{a_f + a_m}(\beta_m - \beta_f). \quad (29)$$

778 Finally, using **Eq. 25**,

$$s_m - s_f = a_m\beta_m - a_f\beta_f = \frac{1}{2}[(a_m + a_f)(\beta_m - \beta_f) + (a_m - a_f)(\beta_m + \beta_f)], \quad (30)$$

779 which together with **Eq. 29** gives

$$s_m - s_f = \frac{1}{2} \left[ (a_m + a_f) + \frac{(a_m - a_f)(a_f - a_m)}{a_f + a_m} \right] (\beta_m - \beta_f) = \frac{2a_m a_f}{a_m + a_f} (\beta_m - \beta_f). \quad (31)$$

780 We denote the heritability due to GxSex at the locus as  $V_{GxSex} := 2p(1-p)(\beta_m - \beta_f)^2$  and  
 781 the parameter relating this contribution to the differentiation in allele frequencies as

$$A := 2 \left( \frac{a_m a_f}{a_m + a_f} \right)^2, \quad (32)$$

782 and plug **Eq. 31** into **Eq. 24**, we get

$$F_{ST} \approx AV_{GxSex}. \quad (33)$$

783 as given by **Eq. 3** in **Results**.

784

785 **Estimating the potential for sexually antagonistic selection on standing variation (A).** For  
 786 each trait and gnomAD subsample (**Supplementary Materials**), we estimated A using weighted

787 least squares linear regression of our estimate of  $F_{ST}$  ( $\widehat{F}_{ST}$ ) to our estimate of  $V_{GxSex}$  ( $\widehat{V}_{GxSex}$ ), with  
 788 weight  $w$  inversely proportional to our site-specific estimate of noise in the estimate of  $V_{GxSex}$ ,

$$w = \frac{1}{\text{Var}[\widehat{V}_{GxSex}]} \quad (34)$$

789 To simplify the estimation of  $\text{Var}[\widehat{V}_{GxSex}]$ , we treated the allele frequency  $p$  as perfectly  
 790 estimated, and as independent of the allele frequency in the GWAS sample—as different data  
 791 are used in the GWAS (UK Biobank) and in the allele frequency estimation (gnomAD). Under  
 792 these assumptions,

$$\text{Var}[\widehat{V}_{GxSex}] = \text{Var}[2p(1-p)\widehat{D}^2] = [2p(1-p)]^2 \text{Var}[(\hat{\beta}_m - \hat{\beta}_f)^2], \quad (35)$$

793 and thus the task at hand is estimating  $\text{Var}[(\hat{\beta}_m - \hat{\beta}_f)^2]$ . Using the law of total variance,

$$\text{Var}[(\hat{\beta}_m - \hat{\beta}_f)^2] = \text{Var}_{\hat{\beta}_f} \left[ E_{\hat{\beta}_m} \left[ (\hat{\beta}_m - \hat{\beta}_f)^2 \mid \hat{\beta}_f \right] \right] + E_{\hat{\beta}_f} \left[ \text{Var}_{\hat{\beta}_m} \left[ (\hat{\beta}_m - \hat{\beta}_f)^2 \mid \hat{\beta}_f \right] \right]. \quad (36)$$

794 We begin with the argument of the first term,

$$E_{\hat{\beta}_m} \left[ (\hat{\beta}_m - \hat{\beta}_f)^2 \mid \hat{\beta}_f \right] = E_{\hat{\beta}_m} \left[ \hat{\beta}_m^2 - 2\hat{\beta}_m\hat{\beta}_f + \hat{\beta}_f^2 \mid \hat{\beta}_f \right] = \mu_m^2 + \sigma_m^2 - 2\mu_m\hat{\beta}_f + \hat{\beta}_f^2, \quad (37)$$

795 where we denote

$$\mu_z = E[\hat{\beta}_z]; \quad (38)$$

$$\sigma_z^2 = \text{Var}[\hat{\beta}_z]$$

796 for each sex  $z \in \{m, f\}$ . Plugging **Eq. 37** into the first term of **Eq. 36**,

$$\begin{aligned} \text{Var}_{\hat{\beta}_f} \left[ E_{\hat{\beta}_m} \left[ (\hat{\beta}_m - \hat{\beta}_f)^2 \mid \hat{\beta}_f \right] \right] &= \text{Var}_{\hat{\beta}_f} [\mu_m^2 + \sigma_m^2] + \text{Var}_{\hat{\beta}_f} [\hat{\beta}_f^2 - 2\mu_m\hat{\beta}_f] = \\ &0 + \text{Var}_{\hat{\beta}_f} [\hat{\beta}_f^2 - 2\mu_m\hat{\beta}_f] = \text{Var}_{\hat{\beta}_f} [\hat{\beta}_f^2] + 4\text{Var}_{\hat{\beta}_f} [\mu_m\hat{\beta}_f] - 4\mu_m \text{Cov}_{\hat{\beta}_f} [\hat{\beta}_f^2, \hat{\beta}_f], \end{aligned} \quad (39)$$

797 where the first and second step follow from the fact that  $\mu_m^2 + \sigma_m^2$  is a constant. We can take note  
 798 of the fact that  $\hat{\beta}_z$  is Normally distributed around  $\beta_z$ , and in particular that it has no skewness.  
 799 Therefore,

$$\text{Cov}_{\hat{\beta}_z} [\hat{\beta}_z^2, \hat{\beta}_z] = E[\hat{\beta}_z^3] - E[\hat{\beta}_z]E[\hat{\beta}_z^2] = (\mu_z^3 + 3\mu_z\sigma_z^2 + \gamma_z\sigma_z^3) - \mu_z(\mu_z^2 + \sigma_z^2) = 2\mu_z\sigma_z^2, \quad (40)$$

800 where  $\gamma_z = 0$  is the skewness of  $\hat{\beta}_z$ . We can also note that

$$\text{Var}_{\hat{\beta}_z} [\hat{\beta}_z^2] = \text{Var}_{\hat{\beta}_z} [(\sigma_z b_z + \mu_z)^2], \quad (41)$$

801 where we defined

$$b_z = \frac{\hat{\beta}_z - \mu_z}{\sigma_z},$$

802 and therefore  $b_z$  is a Standard Normal and therefore  $b_z^2$  is Chi-squared with one degree of  
803 freedom. **Eq. 41** now gives

$$\begin{aligned} \text{Var}_{\hat{\beta}_z}[\hat{\beta}_z^2] &= \text{Var}_{\hat{\beta}_z}[\sigma_z^2 b_z^2 + 2\sigma_z \mu_z b_z] \\ &= \text{Var}_{\hat{\beta}_z}[\sigma_z^2 b_z^2] + \text{Var}[2\sigma_z \mu_z b_z] + \text{Cov}[\sigma_z^2 b_z^2, 2\sigma_z \mu_z b_z] \\ &= \text{Var}[b_z^2] \sigma_z^4 + 4\text{Var}[b_z] \mu_z^2 \sigma_z^2 + 0 = 2\sigma_z^4 + 4\mu_z^2 \sigma_z^2. \end{aligned} \quad (42)$$

804 Plugging **Eq. 40** and **Eq. 42** into **Eq. 39**, we find

$$\text{Var}_{\hat{\beta}_f} \left[ E_{\hat{\beta}_m} \left[ (\hat{\beta}_m - \hat{\beta}_f)^2 \mid \hat{\beta}_f \right] \right] = 2\sigma_f^4 + 4\mu_f^2 \sigma_f^2 + 4\mu_m^2 \sigma_f^2 - 8\mu_m \mu_f \sigma_f^2. \quad (43)$$

805 We now turn to the second term of **Eq. 36**. First,

$$\begin{aligned} \text{Var}_{\hat{\beta}_m} \left[ (\hat{\beta}_m - \hat{\beta}_f)^2 \mid \hat{\beta}_f \right] &= \text{Var}[\hat{\beta}_m^2 + 2\hat{\beta}_m \hat{\beta}_f \mid \hat{\beta}_f] \\ &= \text{Var}[\hat{\beta}_m^2] + 4\sigma_m^2 \hat{\beta}_f^2 - 4\hat{\beta}_f \text{Cov}[\hat{\beta}_m, \hat{\beta}_m^2]. \end{aligned} \quad (44)$$

806 **Eq. 40** and **42** again give us

$$\text{Var}_{\hat{\beta}_m} \left[ (\hat{\beta}_m - \hat{\beta}_f)^2 \mid \hat{\beta}_f \right] = 2\sigma_m^4 + 4\mu_m^2 \sigma_m^2 + 4\sigma_m^2 \hat{\beta}_f^2 - 8\mu_m \sigma_m^2 \hat{\beta}_f, \quad (45)$$

807 which then gives

$$E_{\hat{\beta}_f} \left[ \text{Var}_{\hat{\beta}_m} \left[ (\hat{\beta}_m - \hat{\beta}_f)^2 \mid \hat{\beta}_f \right] \right] = 2\sigma_m^4 + 4\mu_m^2 \sigma_m^2 + 4\sigma_m^2 (\sigma_f^2 + \mu_f^2) - 8\mu_m \mu_f \sigma_m^2. \quad (46)$$

808 Plugging **Eq. 43** and **Eq. 46** into **Eq. 36**, we obtain

$$\begin{aligned} \text{Var}[(\hat{\beta}_m - \hat{\beta}_f)^2] &= \\ &= 2(\sigma_m^4 + \sigma_f^4) + 4\sigma_m^2 \sigma_f^2 + 4(\mu_m^2 \sigma_m^2 + \mu_f^2 \sigma_f^2) + 4(\sigma_m^2 \mu_f^2 + \sigma_f^2 \mu_m^2) \\ &\quad - 8\mu_m \mu_f (\sigma_m^2 + \sigma_f^2). \end{aligned} \quad (47)$$

809 Finally, we estimate  $\mu_z$  with the GWAS-derived point estimate of the effect  $\hat{\beta}_z$  and  $\sigma_z$  with  
810 its standard error,  $\hat{\sigma}_z = [\hat{\beta}_z]$ . Plugging back into **Eq. 35**, we obtain

$$\begin{aligned} \text{Var}[\widehat{V}_{GxSex}] &= [2p(1-p)]^2 [2(\hat{\sigma}_m^4 + \hat{\sigma}_f^4) + 4\hat{\sigma}_m^2 \hat{\sigma}_f^2 + 4(\hat{\beta}_m^2 \sigma_m^2 + \hat{\beta}_f^2 \sigma_f^2) + 4(\hat{\sigma}_m^2 \hat{\beta}_f^2 + \hat{\sigma}_f^2 \hat{\beta}_m^2) \\ &\quad - 8\hat{\beta}_m \hat{\beta}_f (\hat{\sigma}_m^2 + \hat{\sigma}_f^2)]. \end{aligned} \quad (48)$$

811 Using **Eq. 33**, we estimate  $F_{st}$  with the estimator

$$\widehat{F}_{st} = n_{st}/d_{st}, \quad (49)$$

812 where

$$n_{st} = (\widehat{p}_m - \widehat{p}_f)^2 - SE(\widehat{p}_m)^2 - SE(\widehat{p}_f)^2, \quad (50)$$

813 
$$d_{st} = 4\hat{p}(1 - \hat{p}) - SE(\widehat{p}_m)^2 - SE(\widehat{p}_f)^2,$$

814 and noting that

$$E[\widehat{F}_{st}] \approx \frac{E[n_{st}]}{E[d_{st}]} = \frac{(p_m - p_f)^2 - Var(p_m) + Var(p_f) + E\{SE(\widehat{p}_m)^2\} + E\{SE(\widehat{p}_f)^2\}}{4p(1 - p) + Var(p_m)^2 + Var(p_f)^2 - E\{SE(\widehat{p}_m)^2\} - E\{SE(\widehat{p}_f)^2\}} = F_{st}, \quad (51)$$

815 where in the first equality we approximated the expectation of a ratio with the ratio of expectations.  
816 Therefore, **Eq. 49** provides an approximately unbiased estimator of  $F_{st}$  despite the absence of  
817 genotype frequencies.

818 To perform this estimation of  $A$  on the GWAS and  $F_{st}$  data, we used paired  $v$  and  $V_{GxSex}$   
819 points for all sites which passed all previous stages of filtering. Weights were set by **Eq. 34** and  
820 follow **Eq. 48** where  $\hat{\beta}_m$  and  $\hat{\beta}_f$  are the GWAS effect estimates as above, and  $\hat{\sigma}_m$  and  $\hat{\sigma}_f$  are the  
821 GWAS standard errors (SE) estimates for the effect size of each site per trait.

822 To minimize the possibility of LD between sites used in the analysis as much as possible,  
823 we used the approximately independent LD blocks in Europeans<sup>81</sup> as in Section “Mixture weights  
824 for covariance structure between male and female effects”. Namely, we subdivided the genome  
825 into 1703 approximately independent LD blocks as before. We iterated over the 1703 blocks and  
826 sampling one site per block in a given iteration, using a sample of (up to) 1703 post-filtering sites  
827 to perform the weighted linear regression of  $F_{ST}$  on  $V_{G \times Sex}$ . The slope of this regression was used  
828 as an estimate of  $A$ . We perform this estimation procedure 1,000 times and take an average of  
829  $Z$  scores (slope point estimates divided by their SE) as the final estimate of  $A$ . In each replicate,  
830 we sample with replacement  $m$  LD blocks from the  $m$  LD blocks which had at least one site within  
831 them post-filtering (Supplementary Materials); we then sample one site per resampled block. In  
832 **Fig. 7D**, each point is the mean of the 1,000 samples of one site per LD block and 90% confidence  
833 intervals show the range between the 5th and 95th percentile of the 1000 replicates.

834 In the main text, we focus on the results performed this estimation for Ashkenazi Jewish,  
835 Finnish, and Non-Finnish European populations as the other ancestry group-stratified  
836 subsamples in *gnomAD* are further diverged from the UKB White British sample and therefore  
837 our GWAS estimates are expected to be less portable<sup>62,86</sup>. We also performed a similar analysis  
838 using UKB data to measure differentiation in allele frequencies between males and females,  
839 rather than an independent dataset (*gnomAD*) as in the main text. Since individual level data was

840 available in this case, we replaced  $F_{st}$  with  $L_{ST}$ , a measure developed by Ruzicka et al.<sup>56</sup>.  $L_{st}$  can  
841 be thought of as site-specific  $F_{st}$  controlled for major axes of population structure differentiating  
842 males and females (**Fig. S21**).

843

844

845



## 846 **References**

- 847 1. van Doorn, G. S. Intralocus sexual conflict. *Ann N Y Acad Sci* **1168**, 52–71 (2009).
- 848 2. Arnqvist, G. & Rowe, L. *Sexual Conflict*. (Princeton University Press, 2005).  
849 doi:10.1515/9781400850600.
- 850 3. Camus, M. F., Piper, M. D. & Reuter, M. Sex-specific transcriptomic responses to changes  
851 in the nutritional environment. *Elife* **8**, (2019).
- 852 4. Bayer, E. A. *et al.* Ubiquitin-dependent regulation of a conserved DMRT protein controls  
853 sexually dimorphic synaptic connectivity and behavior. *Elife* **9**, (2020).
- 854 5. Baar, E. L., Carbajal, K. A., Ong, I. M. & Lamming, D. W. Sex- and tissue-specific changes  
855 in *mTOR* signaling with age in C57BL/6J mice. *Aging Cell* **15**,  
856 155–166 (2016).
- 857 6. Wat, L. W. *et al.* A role for triglyceride lipase brummer in the regulation of sex differences  
858 in *Drosophila* fat storage and breakdown. *PLoS Biol* **18**, e3000595 (2020).
- 859 7. Wat, L. W., Chowdhury, Z. S., Millington, J. W., Biswas, P. & Rideout, E. J. Sex  
860 determination gene transformer regulates the male-female difference in *Drosophila* fat  
861 storage via the adipokinetic hormone pathway. *Elife* **10**, (2021).
- 862 8. Karp, N. A. *et al.* Prevalence of sexual dimorphism in mammalian phenotypic traits. *Nat*  
863 *Commun* **8**, 15475 (2017).
- 864 9. Khramtsova, E. A., Davis, L. K. & Stranger, B. E. The role of sex in the genomics of human  
865 complex traits. *Nat Rev Genet* **20**, 173–190 (2019).

- 866 10. Barson, N. J. *et al.* Sex-dependent dominance at a single locus maintains variation in age  
867 at maturity in salmon. *Nature* **528**, 405–408 (2015).
- 868 11. Kidwell, J. F., Clegg, M. T., Stewart, F. M. & Prout, T. Regions of stable equilibria for models  
869 of differential selection in the two sexes under random mating. *Genetics* **85**, 171–83 (1977).
- 870 12. Connallon, T., Cox, R. M. & Calsbeek, R. Fitness consequences of sex-specific selection.  
871 *Evolution* **64**, 1671–82 (2010).
- 872 13. Harrison, P. W. *et al.* Sexual selection drives evolution and rapid turnover of male gene  
873 expression. *Proceedings of the National Academy of Sciences* **112**, 4393–4398 (2015).
- 874 14. Cheng, C. & Kirkpatrick, M. Sex-Specific Selection and Sex-Biased Gene Expression in  
875 Humans and Flies. *PLoS Genet* **12**, e1006170 (2016).
- 876 15. Schroderus, E. *et al.* Intra- and Intersexual Trade-Offs between Testosterone and Immune  
877 System: Implications for Sexual and Sexually Antagonistic Selection. *Am Nat* **176**, E90–  
878 E97 (2010).
- 879 16. Power, R. A. *et al.* Fecundity of Patients With Schizophrenia, Autism, Bipolar Disorder,  
880 Depression, Anorexia Nervosa, or Substance Abuse vs Their Unaffected Siblings. *JAMA*  
881 *Psychiatry* **70**, 22 (2013).
- 882 17. Mokkonen, M. & Crespi, B. J. Genomic conflicts and sexual antagonism in human health:  
883 insights from oxytocin and testosterone. *Evol Appl* **8**, 307–325 (2015).
- 884 18. Harper, J. A., Janicke, T. & Morrow, E. H. Systematic review reveals multiple sexually  
885 antagonistic polymorphisms affecting human disease and complex traits. *Evolution (N Y)*  
886 **75**, 3087–3097 (2021).

- 887 19. Oliva, M. *et al.* The impact of sex on gene expression across human tissues. *Science*  
888 (1979) **369**, eaba3066 (2020).
- 889 20. Clayton, J. A. & Collins, F. S. Policy: NIH to balance sex in cell and animal studies. *Nature*  
890 **509**, 282–283 (2014).
- 891 21. Clayton, J. A. Studying both sexes: a guiding principle for biomedicine. *The FASEB Journal*  
892 **30**, 519–524 (2016).
- 893 22. Nature journals raise the bar on sex and gender reporting in research. *Nature* **605**, 396–  
894 396 (2022).
- 895 23. Sinnott-Armstrong, N., Naqvi, S., Rivas, M. & Pritchard, J. K. Gwas of three molecular traits  
896 highlights core genes and pathways alongside a highly polygenic background. *Elife* **10**, 1–  
897 35 (2021).
- 898 24. Carole Hooven. *T: The Story of Testosterone, the Hormone that Dominates and Divides*  
899 *Us*. (Henry Holt and Co., 2021).
- 900 25. Flynn, E. *et al.* Sex-specific genetic effects across biomarkers. *Eur J Hum Genet* **29**, 154–  
901 163 (2021).
- 902 26. Bernabeu, E. *et al.* Sex differences in genetic architecture in the UK Biobank. *Nat Genet*  
903 **53**, 1283–1289 (2021).
- 904 27. Muir, W., Nyquist, W. E. & Xu, S. Alternative partitioning of the genotype-by-environment  
905 interaction. *Theoretical and Applied Genetics* **84**, 193–200 (1992).

- 906 28. Robertson, A. The Sampling Variance of the Genetic Correlation Coefficient. *Biometrics*  
907 **15**, 469 (1959).
- 908 29. Falconer, D. S. The Problem of Environment and Selection. *Am Nat* **86**, 293–298 (1952).
- 909 30. Fry, J. D. The Mixed-Model Analysis of Variance Applied to Quantitative Genetics:  
910 Biological Meaning of the Parameters. *Evolution (N Y)* **46**, 540 (1992).
- 911 31. Yamada, Y. Genotype by Environment Interaction and Genetic Correlation of the same  
912 Trait under Different Environments. *The Japanese Journal of Genetics* **37**, 498–509 (1962).
- 913 32. Brown, B. C., Asian Genetic Epidemiology Network Type 2 Diabetes Consortium, Ye, C.  
914 J., Price, A. L. & Zaitlen, N. Transethnic Genetic-Correlation Estimates from Summary  
915 Statistics. *Am J Hum Genet* **99**, 76–88 (2016).
- 916 33. Galinsky, K. J. *et al.* Estimating cross-population genetic correlations of causal effect sizes.  
917 *Genet Epidemiol* **43**, 180–188 (2019).
- 918 34. Ni, G., Moser, G., Schizophrenia Working Group of the Psychiatric Genomics Consortium,  
919 Wray, N. R. & Lee, S. H. Estimation of Genetic Correlation via Linkage Disequilibrium Score  
920 Regression and Genomic Restricted Maximum Likelihood. *Am J Hum Genet* **102**, 1185–  
921 1194 (2018).
- 922 35. Shi, H., Mancuso, N., Spendlove, S. & Pasaniuc, B. Local Genetic Correlation Gives  
923 Insights into the Shared Genetic Architecture of Complex Traits. *The American Journal of*  
924 *Human Genetics* **101**, 737–751 (2017).
- 925 36. Bulik-Sullivan, B. K. *et al.* An atlas of genetic correlations across human diseases and traits.  
926 *Nat Genet* **47**, 1236–1241 (2015).

- 927 37. DiMarco, M., Zhao, H., Boulicault, M. & Richardson, S. S. Why “sex as a biological variable”  
928 conflicts with precision medicine initiatives. *Cell Rep Med* **3**, 100550 (2022).
- 929 38. Lumish, H. S., O’Reilly, M. & Reilly, M. P. Sex Differences in Genomic Drivers of Adipose  
930 Distribution and Related Cardiometabolic Disorders: Opportunities for Precision Medicine.  
931 *Arteriosclerosis, thrombosis, and vascular biology* vol. 40 45–60 Preprint at  
932 <https://doi.org/10.1161/ATVBAHA.119.313154> (2020).
- 933 39. Boyle, E. A., Li, Y. I. & Pritchard, J. K. An Expanded View of Complex Traits: From  
934 Polygenic to Omnigenic. *Cell* **169**, 1177–1186 (2017).
- 935 40. Shi, H., Kichaev, G. & Pasaniuc, B. Contrasting the Genetic Architecture of 30 Complex  
936 Traits from Summary Association Data. *Am J Hum Genet* **99**, 139–53 (2016).
- 937 41. Sella, G. & Barton, N. H. Thinking About the Evolution of Complex Traits in the Era of  
938 Genome-Wide Association Studies. *Annu Rev Genomics Hum Genet* **20**, 461–493 (2019).
- 939 42. Bulik-Sullivan, B. K. *et al.* LD Score regression distinguishes confounding from polygenicity  
940 in genome-wide association studies. *Nat Genet* **47**, 291–295 (2015).
- 941 43. Benonisdottir, S. & Kong, A. The Genetics of Participation: Method and Analysis. *bioRxiv*  
942 (2022) doi:10.1101/2022.02.11.480067.
- 943 44. Lynch, M. & Walsh, B. *Genetics and Analysis of Quantitative Traits*. (Sinauer Associates,  
944 1998).
- 945 45. Uribut, S. M., Wang, G., Carbonetto, P. & Stephens, M. Flexible statistical methods for  
946 estimating and testing effects in genomic studies with multiple conditions. *Nat Genet* **51**,  
947 187–195 (2019).

- 948 46. Pasquali, R. Obesity and androgens: facts and perspectives. *Fertil Steril* **85**, 1319–40  
949 (2006).
- 950 47. Domingue, B. W., Kanopka, K., Mallard, T. T., Trejo, S. & Tucker-Drob, E. M. Modeling  
951 Interaction and Dispersion Effects in the Analysis of Gene-by-Environment Interaction.  
952 *Behav Genet* **52**, 56–64 (2022).
- 953 48. Liu, D. *et al.* Skeletal muscle gene expression in response to resistance exercise: sex  
954 specific regulation. *BMC Genomics* **11**, 659 (2010).
- 955 49. Lutz, S. Z. *et al.* Sex-Specific Associations of Testosterone With Metabolic Traits. *Front*  
956 *Endocrinol (Lausanne)* **10**, (2019).
- 957 50. Kraemer, W. J., Ratamess, N. A. & Nindl, B. C. Recovery responses of testosterone,  
958 growth hormone, and IGF-1 after resistance exercise. *J Appl Physiol* **122**, 549–558 (2017).
- 959 51. Roberts, B. M., Nuckols, G. & Krieger, J. W. Sex Differences in Resistance Training: A  
960 Systematic Review and Meta-Analysis. *J Strength Cond Res* **34**, 1448–1460 (2020).
- 961 52. Zajitschek, S. R. *et al.* Sexual dimorphism in trait variability and its eco-evolutionary and  
962 statistical implications. *Elife* **9**, (2020).
- 963 53. Kasimatis, K. R. *et al.* Evaluating human autosomal loci for sexually antagonistic viability  
964 selection in two large biobanks. *Genetics* **217**, (2021).
- 965 54. Ryan, M. *The Genetics of Political Behavior*. (Routledge, 2020).
- 966 55. Ruzicka, F., Holman, L. & Connallon, T. Polygenic signals of sexually antagonistic selection  
967 in contemporary human genomes. *bioRxiv* (2021) doi:10.1101/2021.09.20.461171.



- 968 56. Ruzicka, F. *et al.* The search for sexually antagonistic genes: Practical insights from studies  
969 of local adaptation and statistical genomics. *Evol Lett* **4**, 398–415 (2020).
- 970 57. Wright, S. The genetical structure of populations. *Ann Eugen* **15**, 323–54 (1951).
- 971 58. Weir, B. S. & Cockerham, C. C. Estimating F-Statistics for the Analysis of Population  
972 Structure. *Evolution (N Y)* **38**, 1358 (1984).
- 973 59. Karczewski, K. J. *et al.* The mutational constraint spectrum quantified from variation in  
974 141,456 humans. *Nature* **581**, 434–443 (2020).
- 975 60. Pirastu, N. *et al.* Genetic analyses identify widespread sex-differential participation bias.  
976 *Nat Genet* **53**, 663–671 (2021).
- 977 61. Bissegger, M., Laurentino, T. G., Roesti, M. & Berner, D. Widespread intersex  
978 differentiation across the stickleback genome – The signature of sexually antagonistic  
979 selection? *Mol Ecol* **29**, 262–271 (2020).
- 980 62. Privé, F. *et al.* Portability of 245 polygenic scores when derived from the UK Biobank and  
981 applied to 9 ancestry groups from the same cohort. *The American Journal of Human*  
982 *Genetics* **109**, 12–23 (2022).
- 983 63. Traglia, M., Bout, M. & Weiss, L. A. Sex-heterogeneous SNPs disproportionately influence  
984 gene expression and health. *PLoS Genet* **18**, e1010147 (2022).
- 985 64. Berg, J. J. *et al.* Reduced signal for polygenic adaptation of height in UK Biobank. *Elife* **8**,  
986 (2019).

- 987 65. Sohail, M. *et al.* Polygenic adaptation on height is overestimated due to uncorrected  
988 stratification in genome-wide association studies. *Elife* **8**, (2019).
- 989 66. Young, A. I., Benonisdottir, S., Przeworski, M. & Kong, A. Deconstructing the sources of  
990 genotype-phenotype associations in humans. *Science* **365**, 1396–1400 (2019).
- 991 67. Coop, G. & Przeworski, M. Lottery, luck, or legacy. A review of “The Genetic Lottery: Why  
992 DNA matters for social equality”. *Evolution (N Y)* **76**, 846–853 (2022).
- 993 68. Mills, M. C. & Troup, F. C. Sociology, Genetics, and the Coming of Age of Sociogenomics.  
994 *Annu Rev Sociol* **46**, 553–581 (2020).
- 995 69. Coop, G. Reading tea leaves? Polygenic scores and differences in traits among groups.  
996 Preprint at (2019).
- 997 70. Ober, C., Loisel, D. A. & Gilad, Y. Sex-specific genetic architecture of human disease. *Nat*  
998 *Rev Genet* **9**, 911–922 (2008).
- 999 71. Khan, S. S. *et al.* Association of Body Mass Index With Lifetime Risk of Cardiovascular  
1000 Disease and Compression of Morbidity. *JAMA Cardiol* **3**, 280 (2018).
- 1001 72. Vazquez, G., Duval, S., Jacobs, D. R. & Silventoinen, K. Comparison of Body Mass Index,  
1002 Waist Circumference, and Waist/Hip Ratio in Predicting Incident Diabetes: A Meta-  
1003 Analysis. *Epidemiol Rev* **29**, 115–128 (2007).
- 1004 73. Ning, Y., Wang, L. & Giovannucci, E. L. A quantitative analysis of body mass index and  
1005 colorectal cancer: findings from 56 observational studies. *Obesity Reviews* **11**, 19–30  
1006 (2010).

- 1007 74. Brown, C. D. *et al.* Body Mass Index and the Prevalence of Hypertension and Dyslipidemia.  
1008 *Obes Res* **8**, 605–619 (2000).
- 1009 75. Arthur, R. S., Dannenberg, A. J. & Rohan, T. E. The association of prediagnostic circulating  
1010 levels of cardiometabolic markers, testosterone and sex hormone-binding globulin with risk  
1011 of breast cancer among normal weight postmenopausal women in the UK Biobank. *Int J*  
1012 *Cancer* **149**, 42–57 (2021).
- 1013 76. Wang, J. *et al.* Sex-specific associations of circulating testosterone levels with all-cause  
1014 and cause-specific mortality. *Eur J Endocrinol* **184**, 723–732 (2021).
- 1015 77. Fry, A. *et al.* Comparison of Sociodemographic and Health-Related Characteristics of UK  
1016 Biobank Participants With Those of the General Population. *Am J Epidemiol* **186**, 1026–  
1017 1034 (2017).
- 1018 78. Bycroft, C. *et al.* The UK Biobank resource with deep phenotyping and genomic data.  
1019 *Nature* **562**, 203–209 (2018).
- 1020 79. Haworth, S. *et al.* Apparent latent structure within the UK Biobank sample has implications  
1021 for epidemiological analysis. *Nat Commun* **10**, 333 (2019).
- 1022 80. Stephens, M. False discovery rates: a new deal. *Biostatistics* kxw041 (2016)  
1023 doi:10.1093/biostatistics/kxw041.
- 1024 81. Berisa, T. & Pickrell, J. K. Approximately independent linkage disequilibrium blocks in  
1025 human populations. *Bioinformatics* **32**, 283–5 (2016).
- 1026 82. Sudlow, C. *et al.* UK Biobank: An Open Access Resource for Identifying the Causes of a  
1027 Wide Range of Complex Diseases of Middle and Old Age. *PLoS Med* **12**, e1001779 (2015).

- 1028 83. Davies, N. M., Holmes, M. v & Davey Smith, G. Reading Mendelian randomisation studies:  
1029 a guide, glossary, and checklist for clinicians. *BMJ* k601 (2018) doi:10.1136/bmj.k601.
- 1030 84. Davey Smith, G. & Ebrahim, S. 'Mendelian randomization': can genetic epidemiology  
1031 contribute to understanding environmental determinants of disease?\*. *Int J Epidemiol* **32**,  
1032 1–22 (2003).
- 1033 85. Gillespie, J. H. *Population Genetics: A Concise Guide*. (Johns Hopkins University Press,  
1034 2004).
- 1035 86. Wang, Y. *et al.* Theoretical and empirical quantification of the accuracy of polygenic scores  
1036 in ancestry divergent populations. *Nat Commun* **11**, 3865 (2020).
- 1037
